# Supplementary material for: Large range sizes link fast life histories with high species richness across wet tropical tree floras
Source: Springer Nature journal article supplement (doi:10.1038/s41598-024-84367-3), 2025-02-07

**Tricalysia**

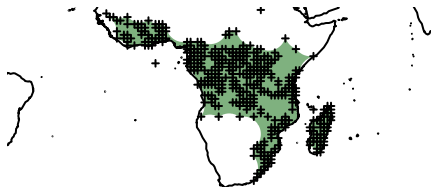

**Trichilia**

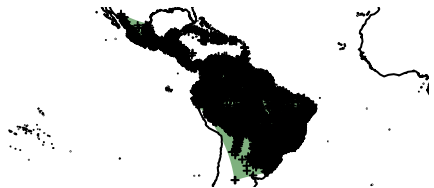

**Trichilia**

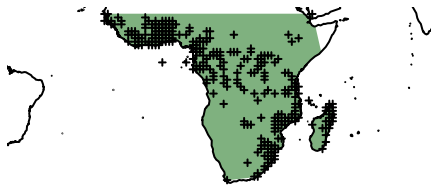

**Trichoscypha**

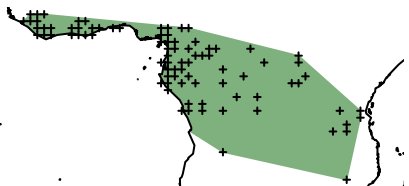

**Tridesmostemon**

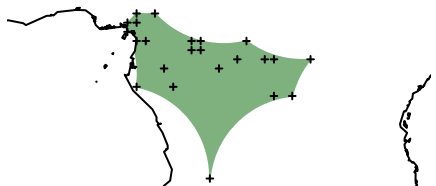

**Trilepisium**

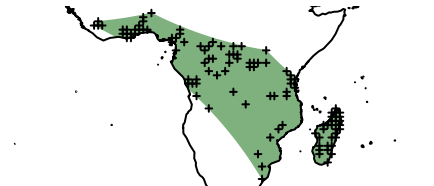

Triplaris

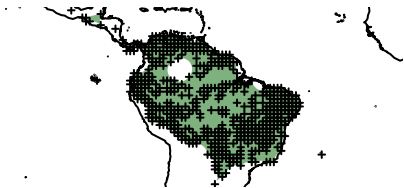

Triplochiton

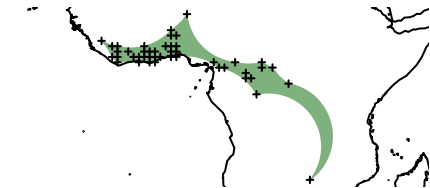

Tristania

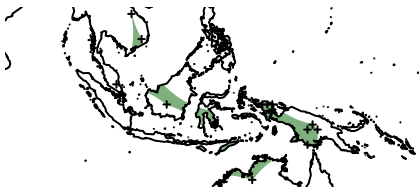

Tristania

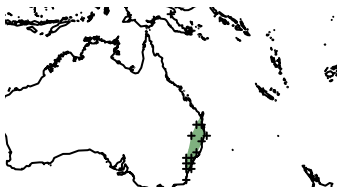

Tristaniopsis

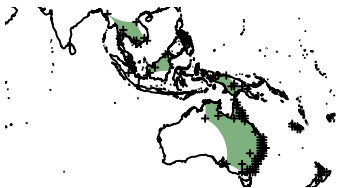

Trophis

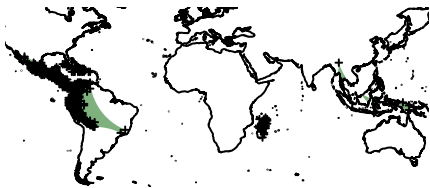

**Turpinia**

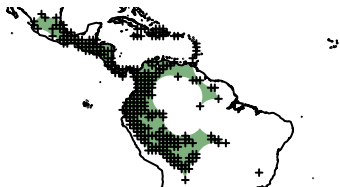

**Turpinia**

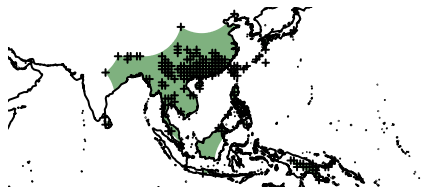

**Turraeanthus**

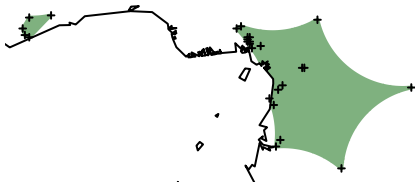

**Uapaca**

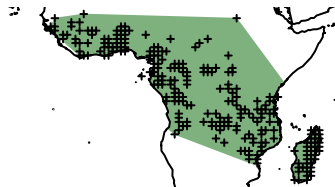

**Unonopsis**

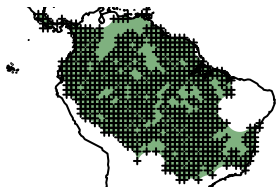

**Uvariopsis**

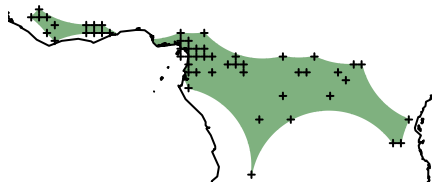

Vangueria

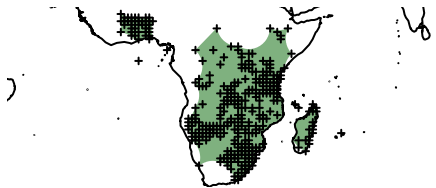

Vantanea

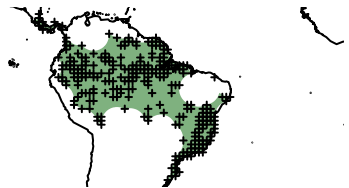

Vatica

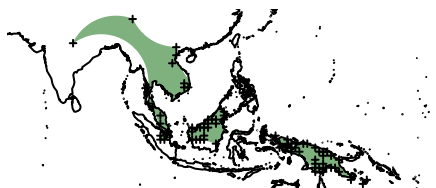

Vepris

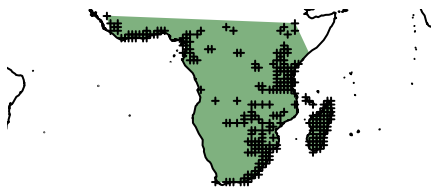

Viola

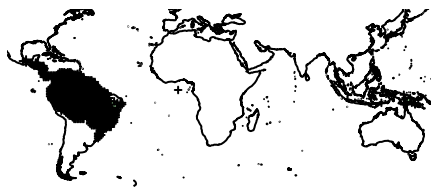

Vismia

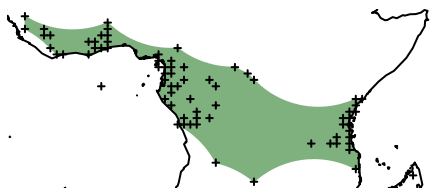

Vismia

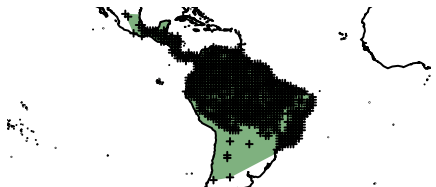

Vitex

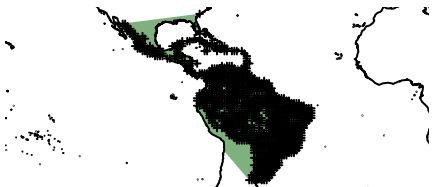

Vitex

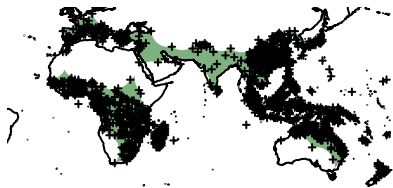

Vochysia

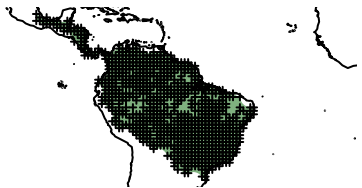

Vouacapoua

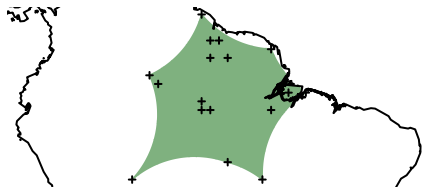

Xanthophyllum

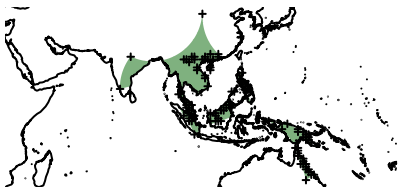

**Xerospermum**

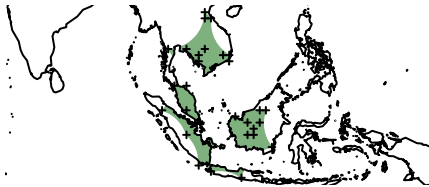

**Xylopi**

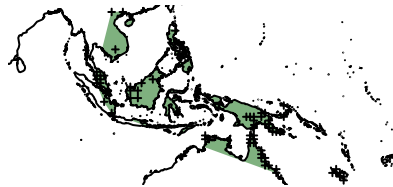

**Xylopi**

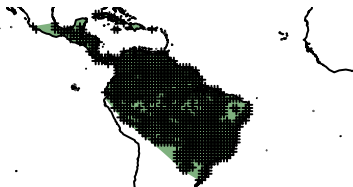

**Xylopi**

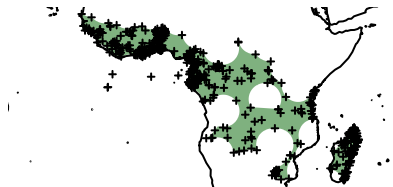

**Xymalos**

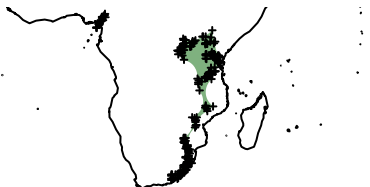

**Zanthoxylum**

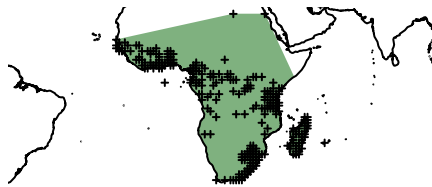

Zanthoxylum

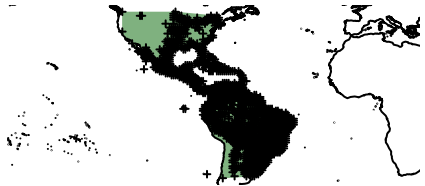

Zanthoxylum

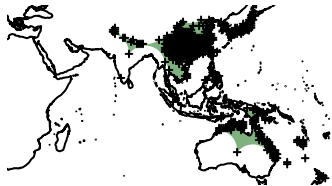

Zygia

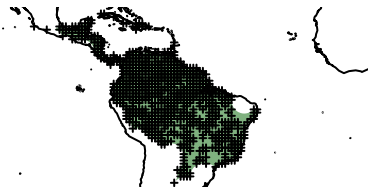

Supplement: MOESM11 [file 41598_2024_84367_MOESM11_ESM.pdf]
