# Supplementary material for: Large range sizes link fast life histories with high species richness across wet tropical tree floras
Source: Springer Nature journal article supplement (doi:10.1038/s41598-024-84367-3), 2025-02-07

Mareya

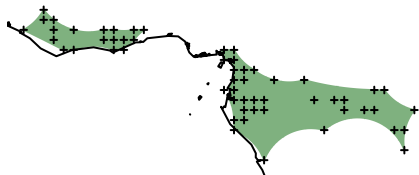

Mareyopsis

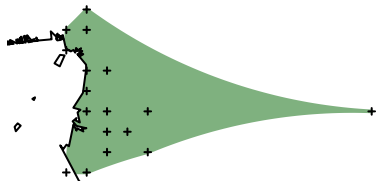

Margaritaria

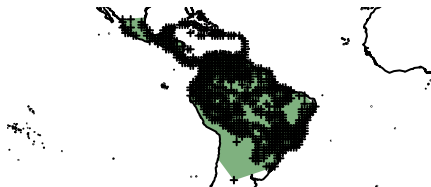

Margaritaria

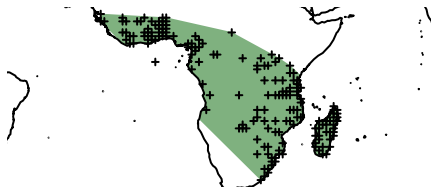

Margaritaria

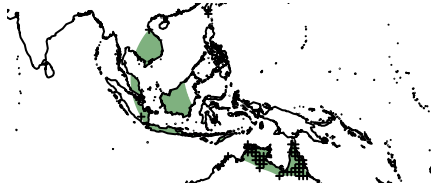

Markhamia

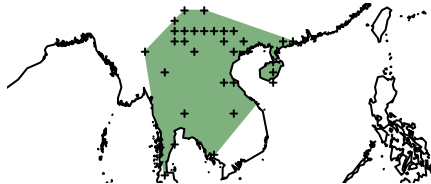

**Markhamia**

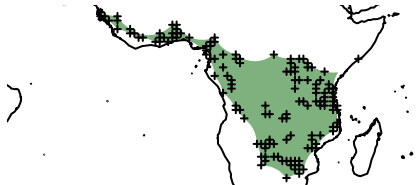

**Matayba**

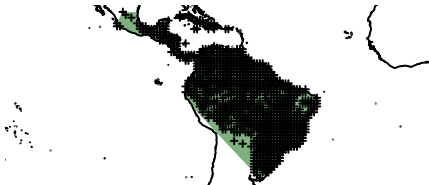

**Matisia**

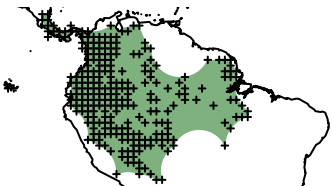

**Mauritia**

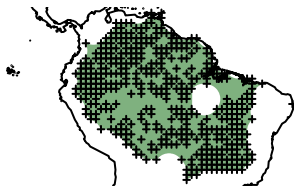

**Maytenus**

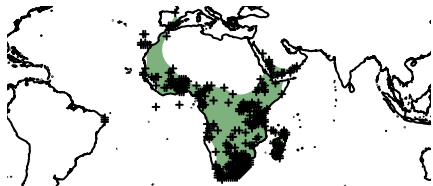

**Maytenus**

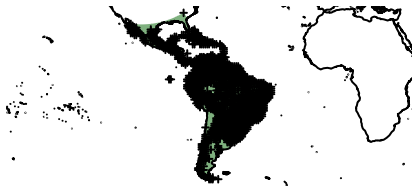

**Memecylon**

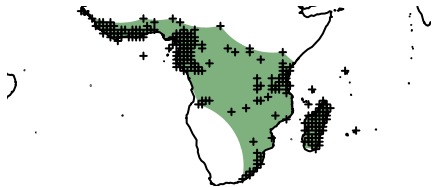

**Memecylon**

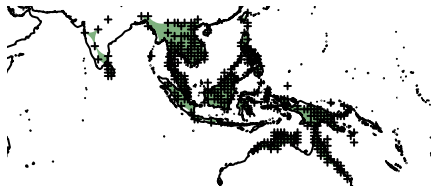

**Mesua**

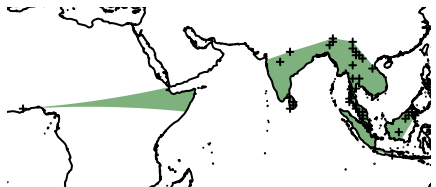

**Metrodorea**

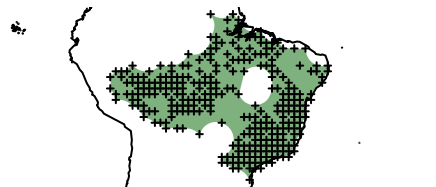

**Mezilaurus**

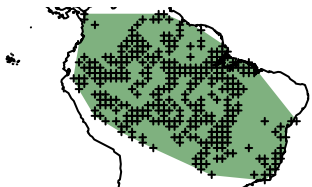

**Mezzettia**

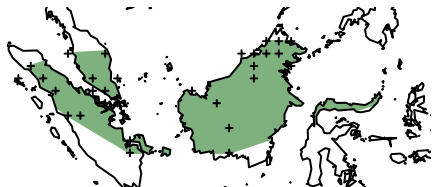

**Miconia**

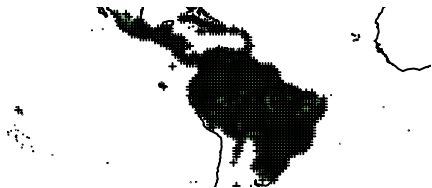

**Micandra**

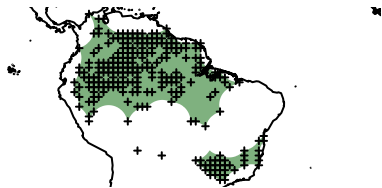

**Micrandropsis**

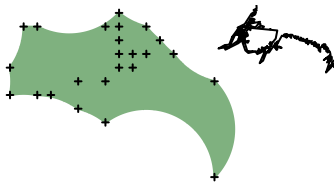

**Microcos**

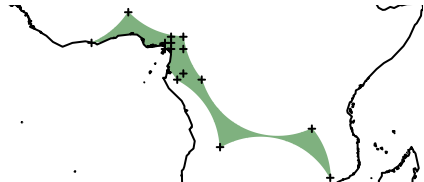

**Microcos**

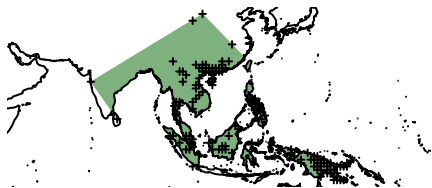

**Micropholis**

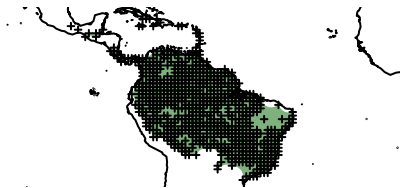

**Milicia**

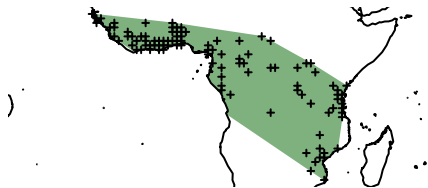

**Millettia**

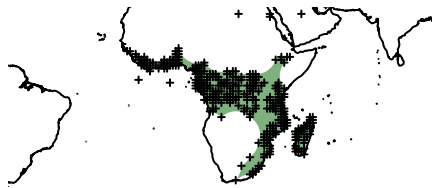

**Millettia**

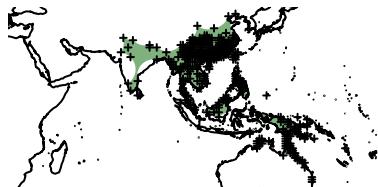

**Minquartia**

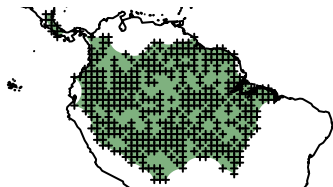

**Monocarpia**

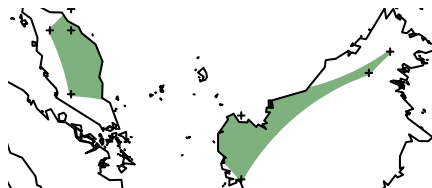

**Monodora**

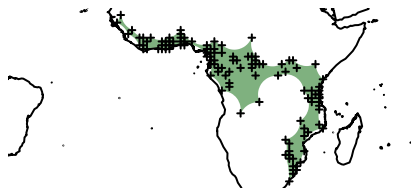

**Mora**

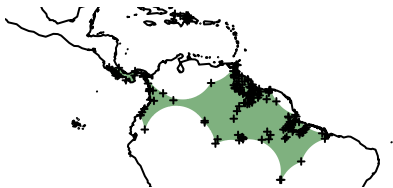

**Moultonianthus**

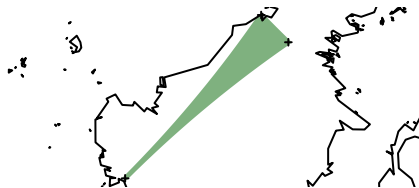

**Mouriri**

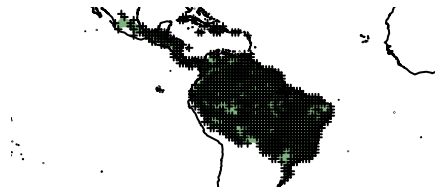

**Musanga**

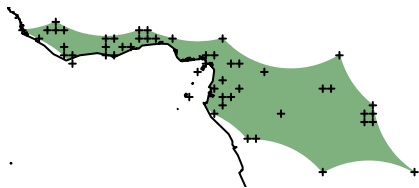

**Myrcia**

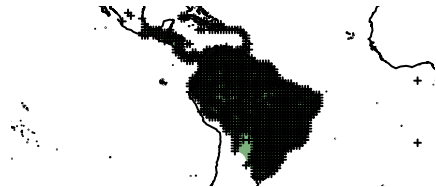

**Myrciaria**

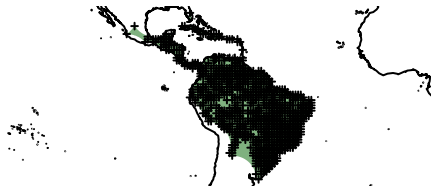

**Myrianthus**

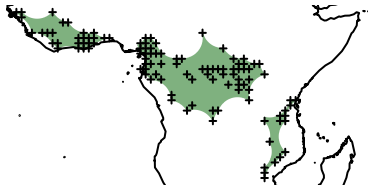

**Myristica**

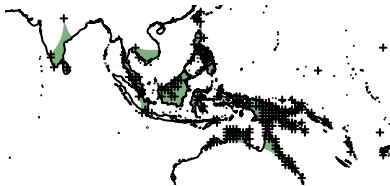

**Nauclea**

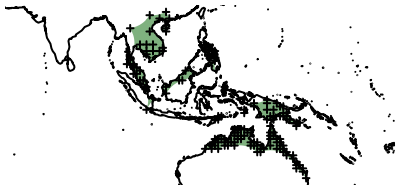

**Nauclea**

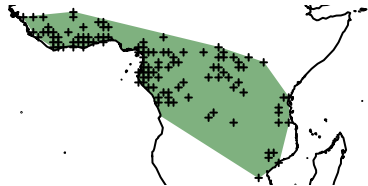

**Naucleopsis**

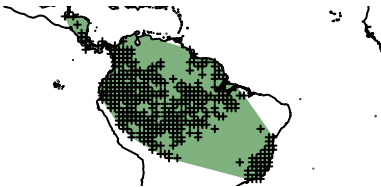

**Nealchornea**

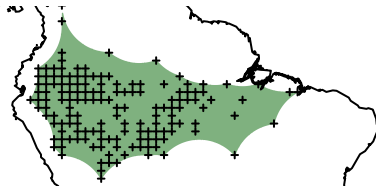

**Nectandra**

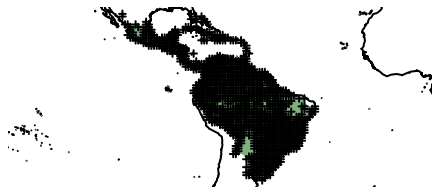

**Neea**

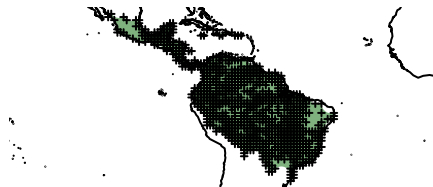

**Neoscortechinia**

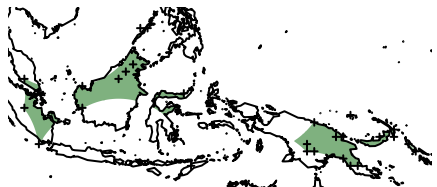

**Nephelium**

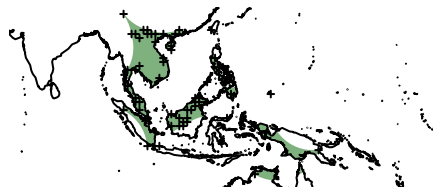

**Nesogordonia**

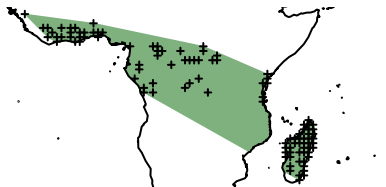

**Newtonia**

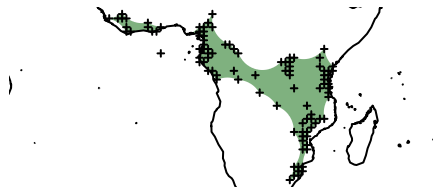



Ochna

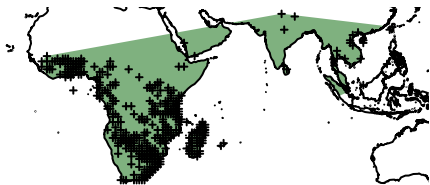

Ochthocosmus

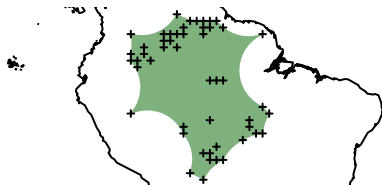

Ochthocosmus

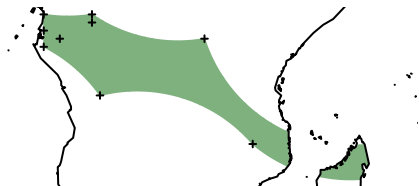

Ocotea

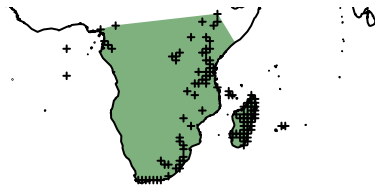

Ocotea

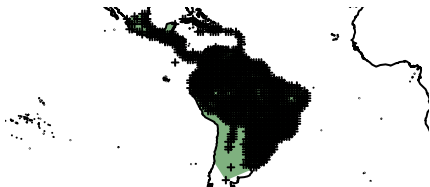

Octoknema

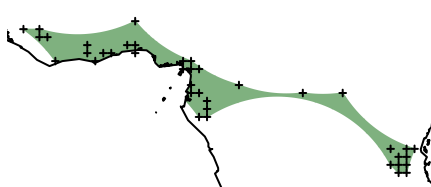

Oenocarpus

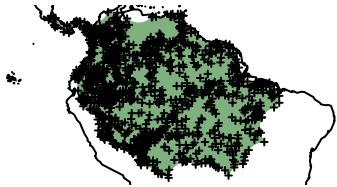

Olax

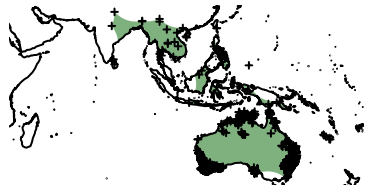

Olax

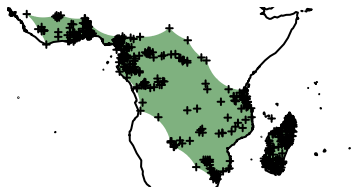

Oncoba

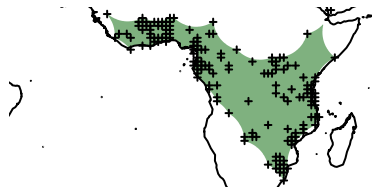

Oncosperma

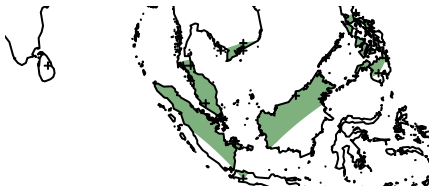

Ongokea

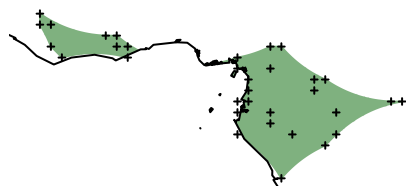

Supplement: MOESM7 [file 41598_2024_84367_MOESM7_ESM.pdf]
