# Supplementary material for: Large range sizes link fast life histories with high species richness across wet tropical tree floras
Source: Springer Nature journal article supplement (doi:10.1038/s41598-024-84367-3), 2025-02-07

Sloanea

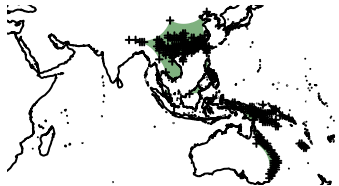

Socratea

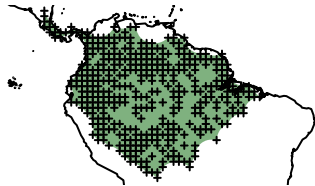

Sorindeia

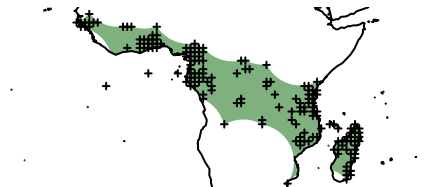

Sorocea

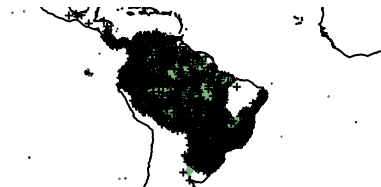

Spondias

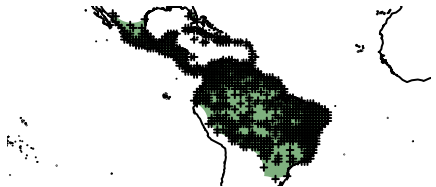

Spondias

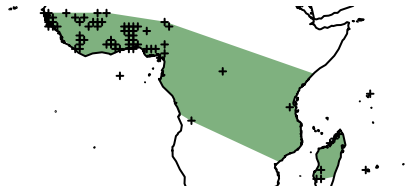

**Spondias**

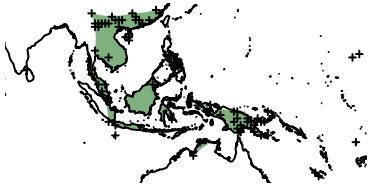

**Stachyothyrus**

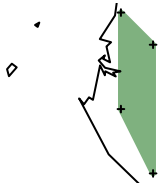

**Staudtia**

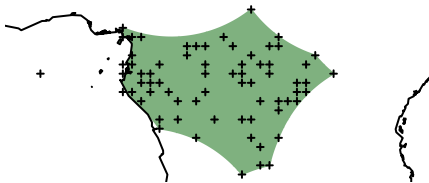

**Stemonurus**

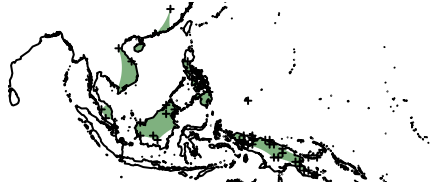

**Sterculia**

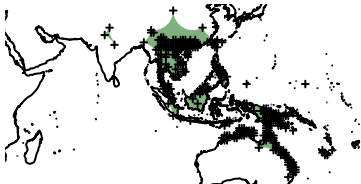

**Sterculia**

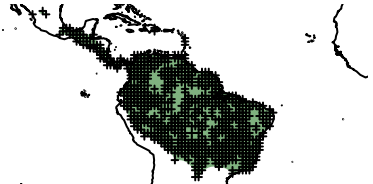

**Sterculia**

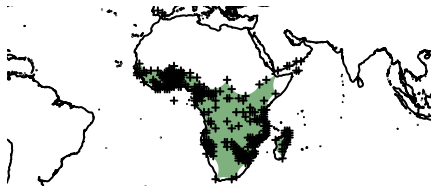

**Strephonema**

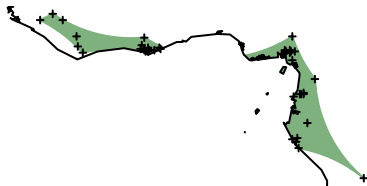

**Strombosia**

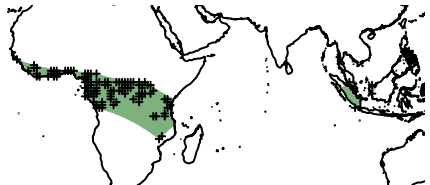

**Strombosiopsis**

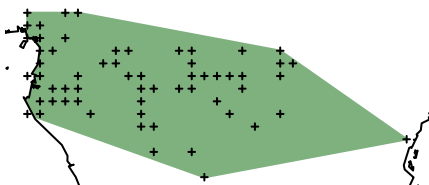

**Stryphnodendron**

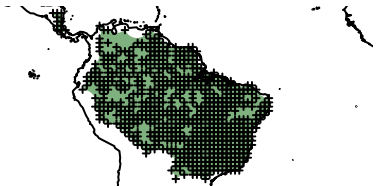

**Swartzia**

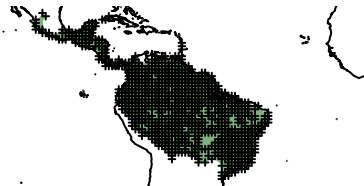

**Symphonia**

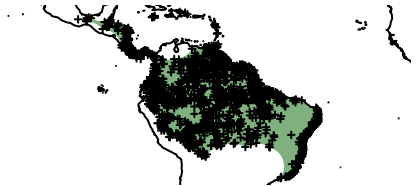

**Symphonia**

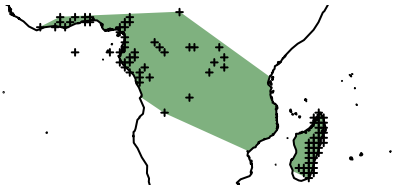

**Symplocos**

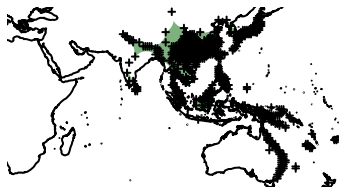

**Symplocos**

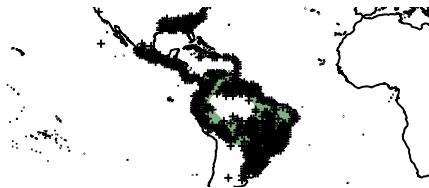

**Synsepalum**

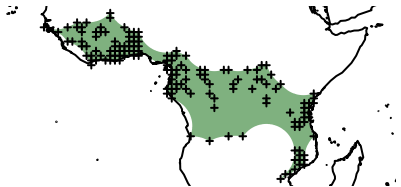

**Syzygium**

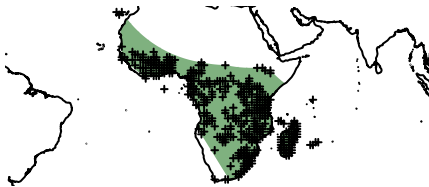



**Syzygium**

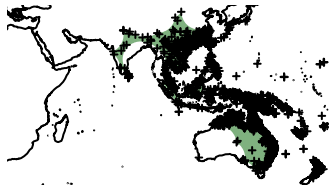

**Tabebuia**

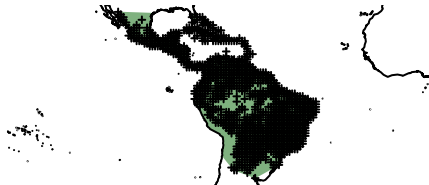

**Tabernaemontana**

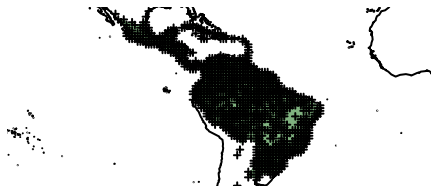

**Tabernaemontana**

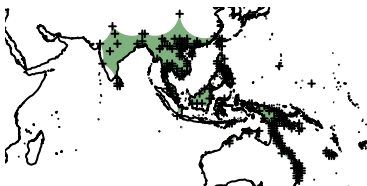

**Tabernaemontana**

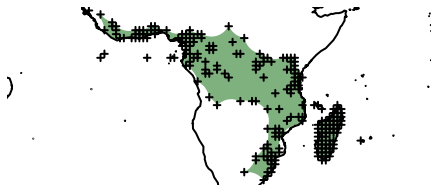

**Tachigali**

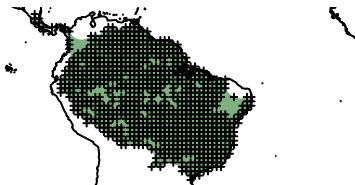

Talisia

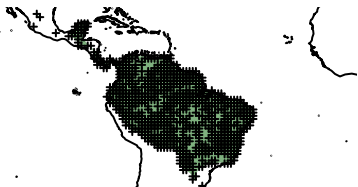

Tapirira

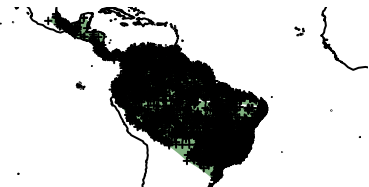

Tapura

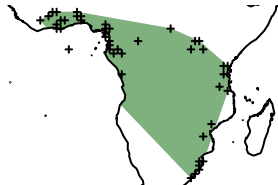

Tapura

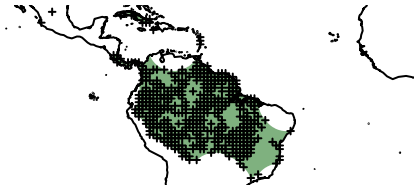

Tarena

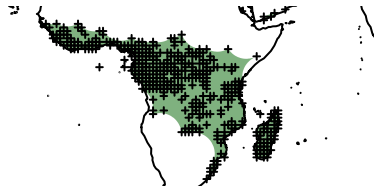

Tarena

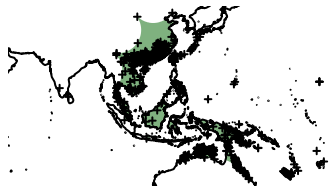

Tarrietia

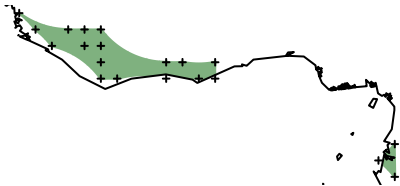

Teijsmanniodendron

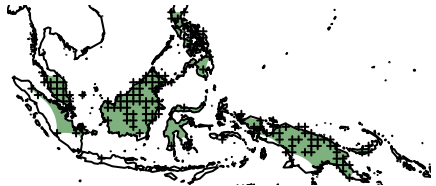

Terminalia

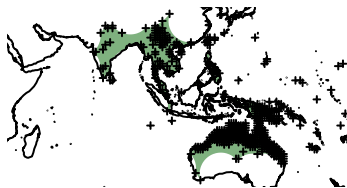

Terminalia

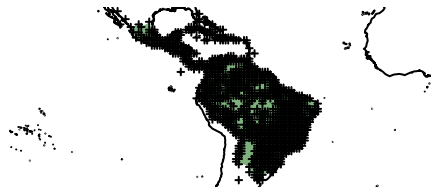

Terminalia

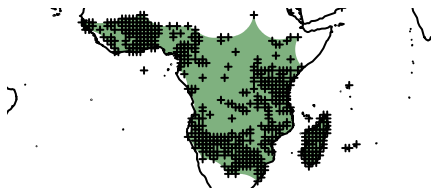

Ternstroemia

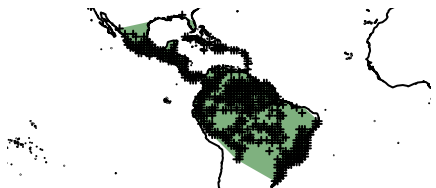

**Ternstroemia**

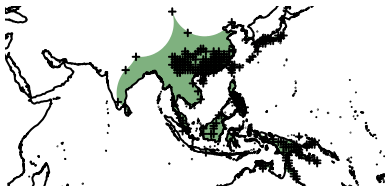

**Tessmannia**

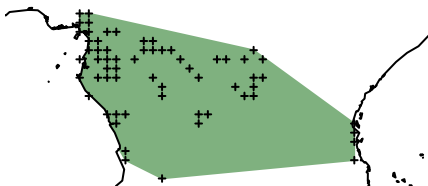

**Tessmannia**

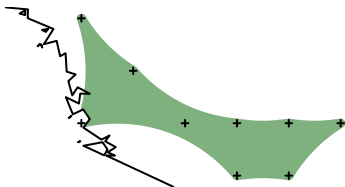

**Tetraberlinia**

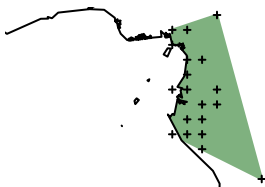

**Tetragastris**

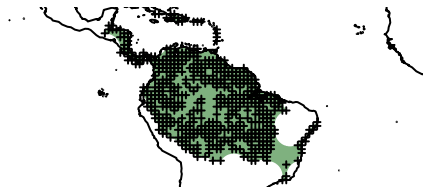

**Tetrapleura**

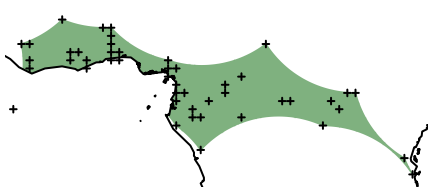

Tetrathylacium

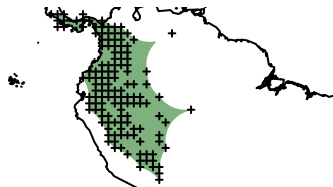

Tetrorchidium

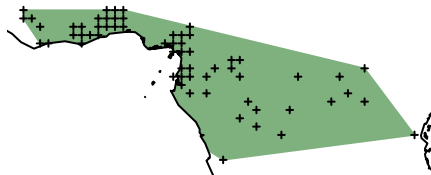

Tetrorchidium

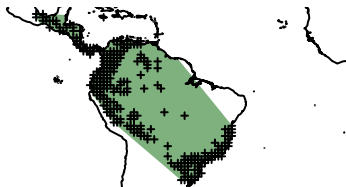

Theobroma

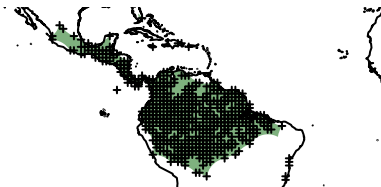

Thyrsodium

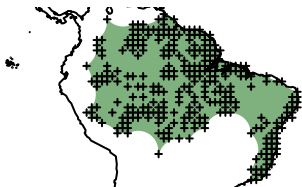

Timonium

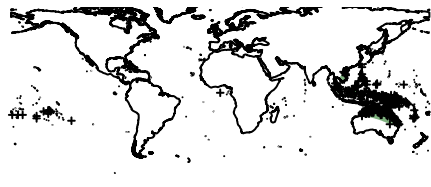

Tovomita

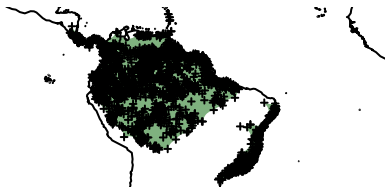

Trattinnickia

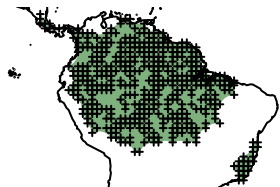

Treculia

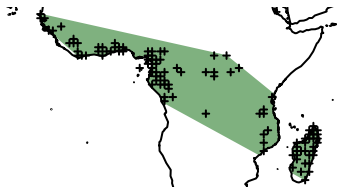

Trema

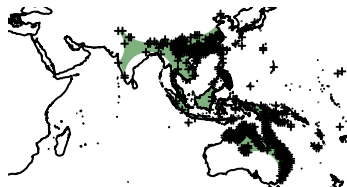

Trema

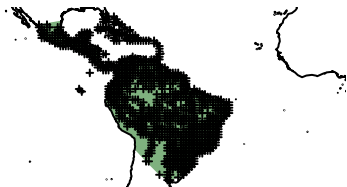

Trema

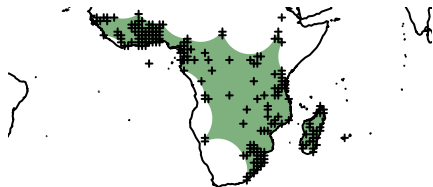

Supplement: MOESM10 [file 41598_2024_84367_MOESM10_ESM.pdf]
