# Supplementary material for: Large range sizes link fast life histories with high species richness across wet tropical tree floras
Source: Springer Nature journal article supplement (doi:10.1038/s41598-024-84367-3), 2025-02-07

**Centroplacus**

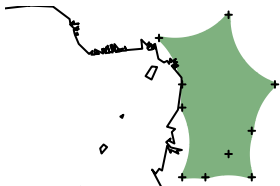

**Cephalomappa**

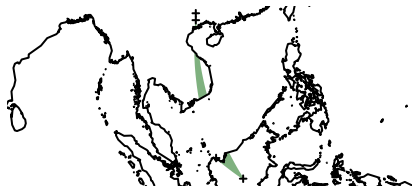

**Chaetocarpus**

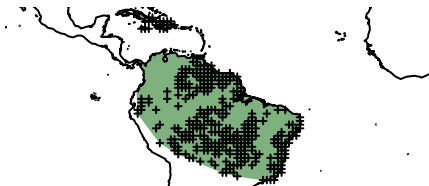

**Chaetocarpus**

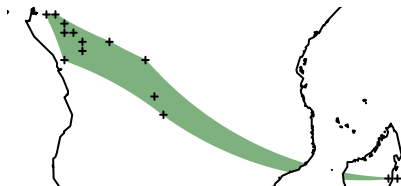

**Chaetocarpus**

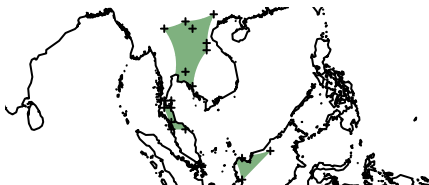

**Cheiloclinium**

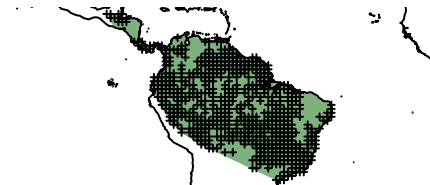

**Chimarrhis**

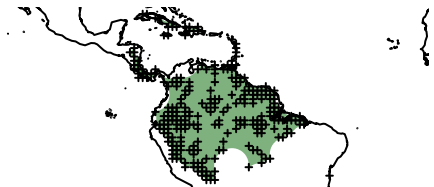

**Chionanthus**

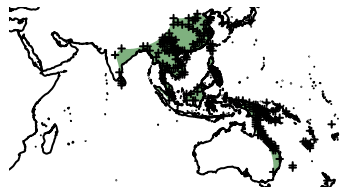

**Chionanthus**

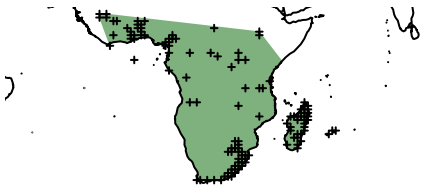

**Chionanthus**

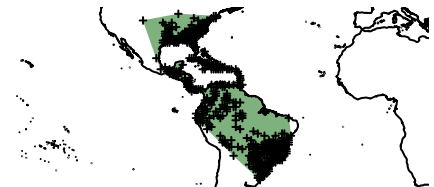

**Chisocheton**

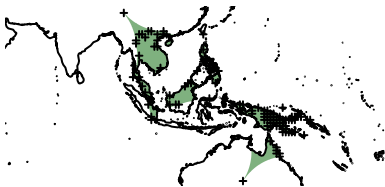

**Chlorocardium**

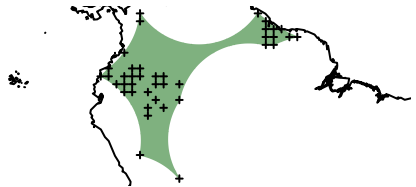

**Chrysochlamys**

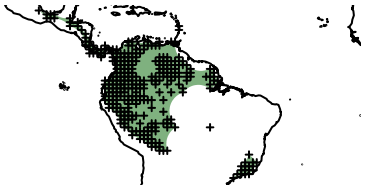

**Chrysophyllum**

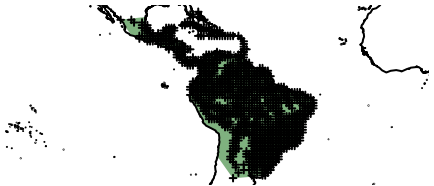

**Chrysophyllum**

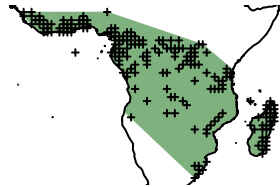

**Chrysophyllum**

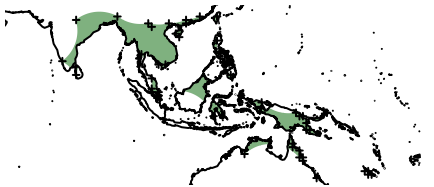

**Cinnamomum**

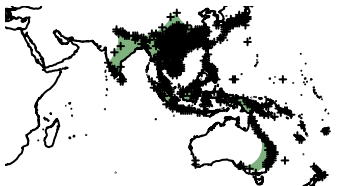

**Clarisia**

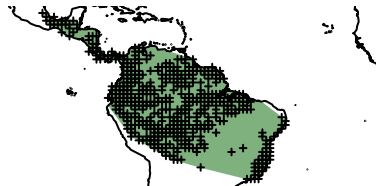

**Cleistanthus**

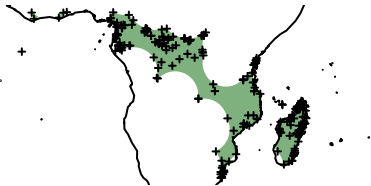

**Cleistanthus**

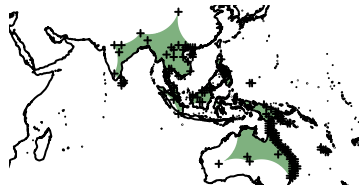

**Cleistopholis**

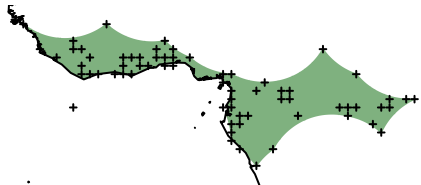

**Coccoloba**

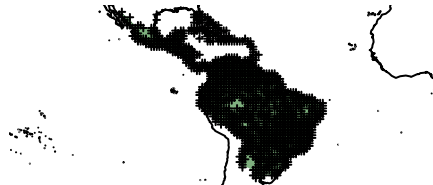

**Coelocaryon**

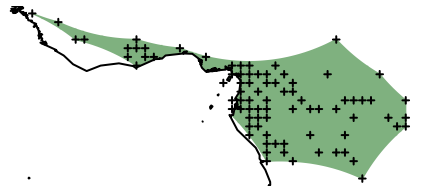

**Coffea**

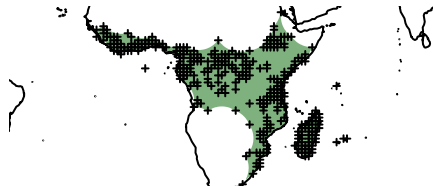



**Coffea**

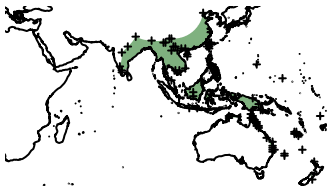

**Cola**

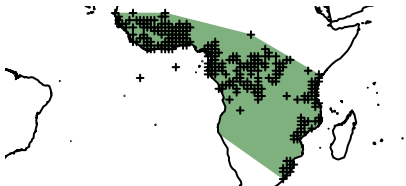

**Colubrina**

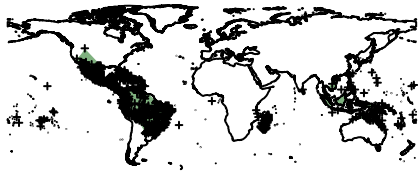

**Combretum**

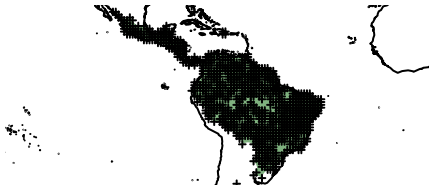

**Combretum**

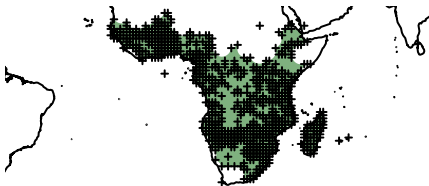

**Combretum**

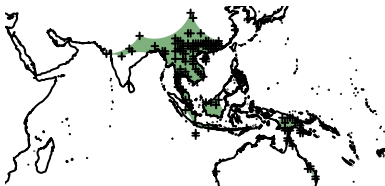

Conceveiba

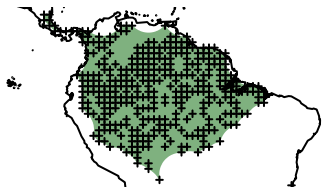

Copaifera

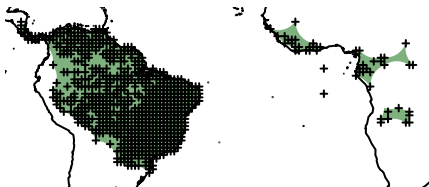

Cordia

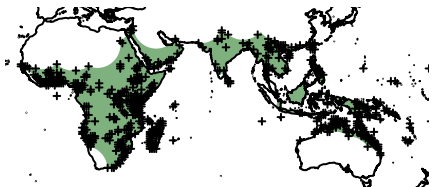

Cordia

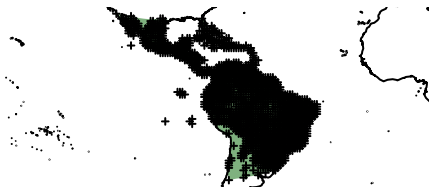

Corynanthe

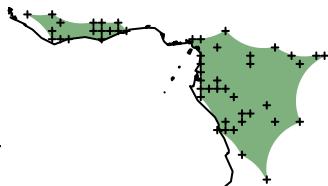

Corythophora

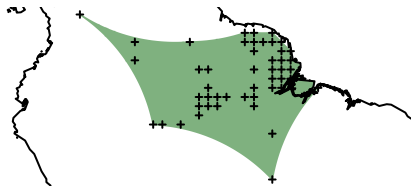

**Couepia**

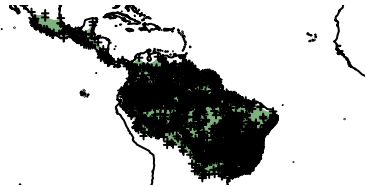

**Coula**

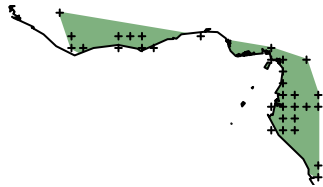

**Couratari**

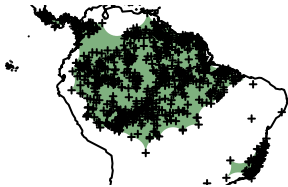

**Cratoxylum**

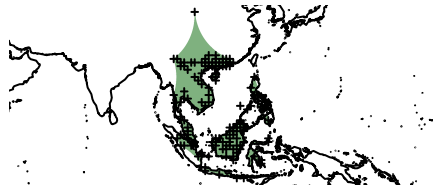

**Crossopteryx**

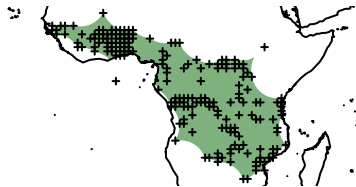

**Croton**

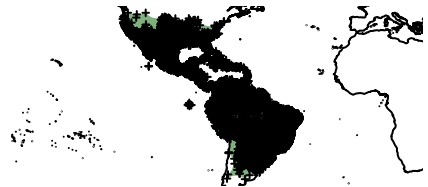

**Croton**

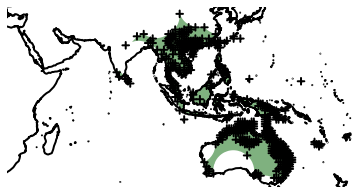

**Croton**

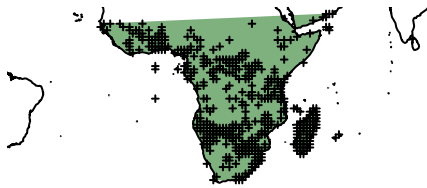

**Crudia**

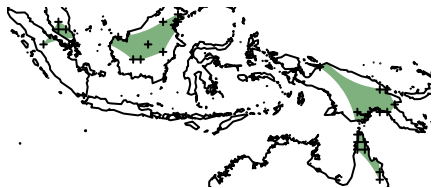

**Crudia**

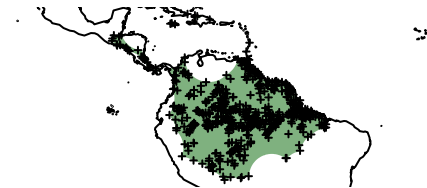

**Crudia**

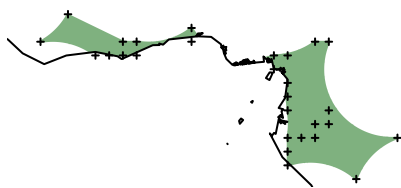

**Cryptocarya**

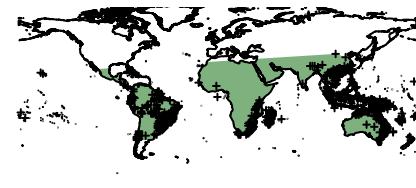

Ctenolophon

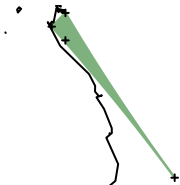

Ctenolophon

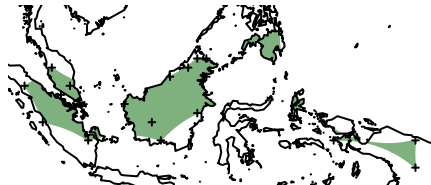

Cupania

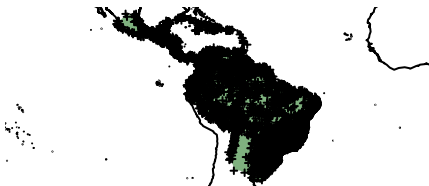

Cyathocalyx

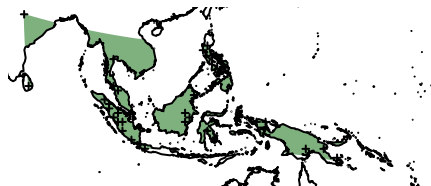

Cylicodiscus

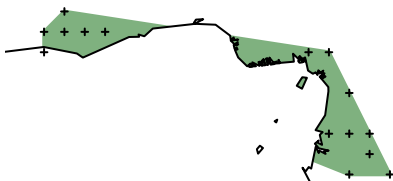

Cynometra

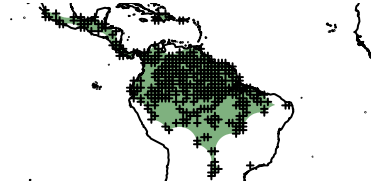

**Cynometra**

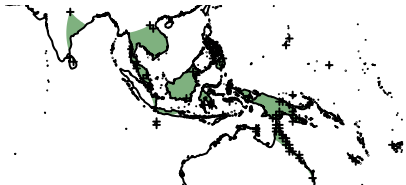

**Cynometra**

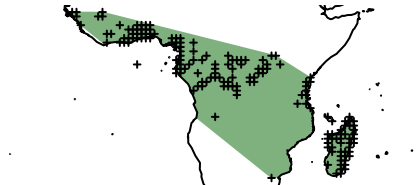

**Dacryodes**

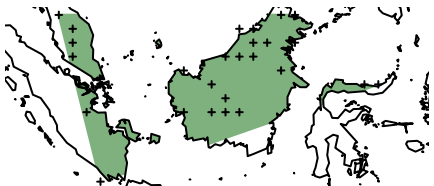

**Dacryodes**

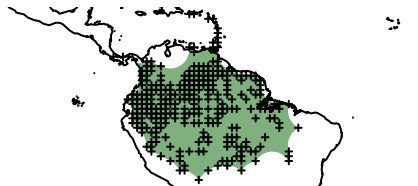

**Dactyladenia**

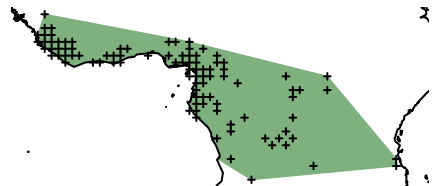

**Dalbergia**

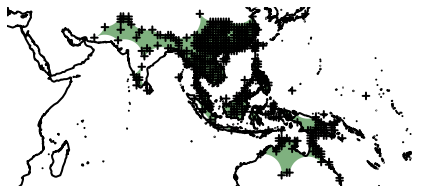

Supplement: MOESM3 [file 41598_2024_84367_MOESM3_ESM.pdf]
