# Supplementary material for: Large range sizes link fast life histories with high species richness across wet tropical tree floras
Source: Springer Nature journal article supplement (doi:10.1038/s41598-024-84367-3), 2025-02-07

Ormosia

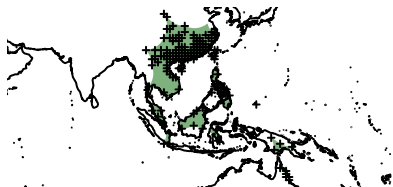

Ormosia

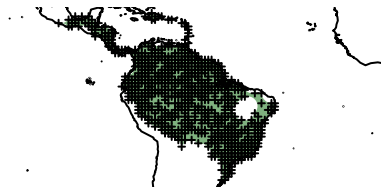

Osteophloeum

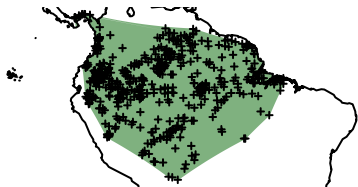

Oubanguia

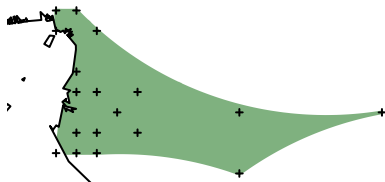

Ouratea

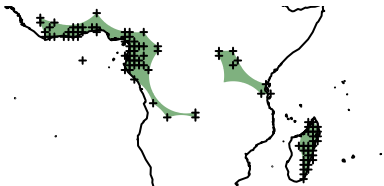

Ouratea

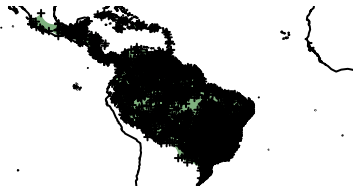

**Oxandra**

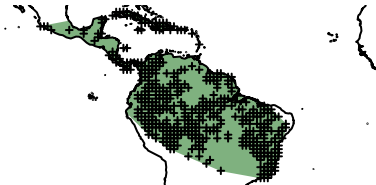

**Pachira**

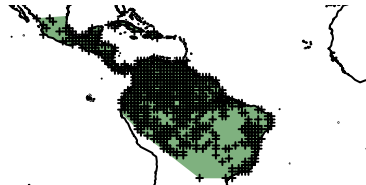

**Palaquium**

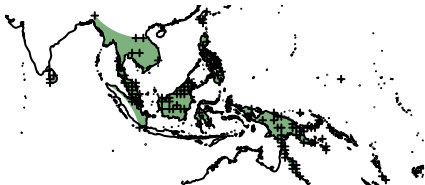

**Pancovia**

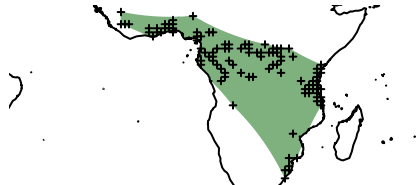

**Panda**

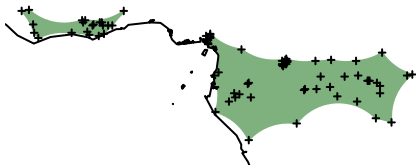

**Paramachaerium**

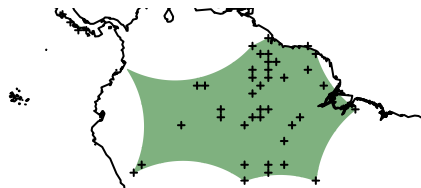

**Paranephelium**

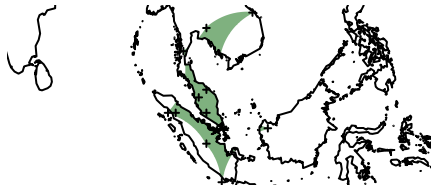

**Parashorea**

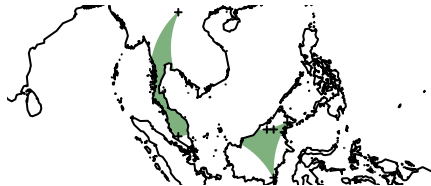

**Parinari**

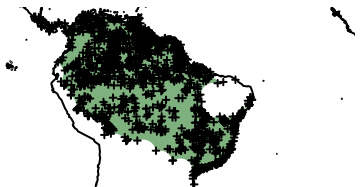

**Parinari**

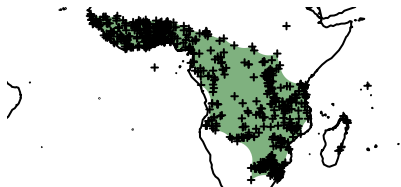

**Parinari**

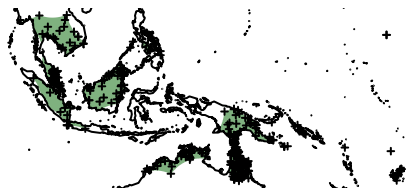

**Parkia**

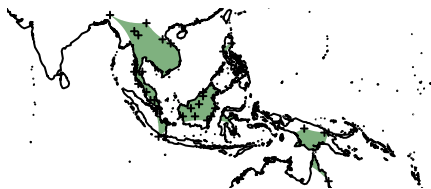

**Parkia**

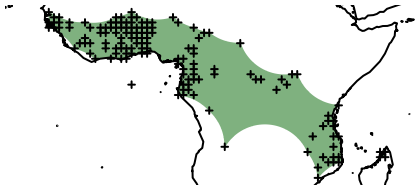

**Parkia**

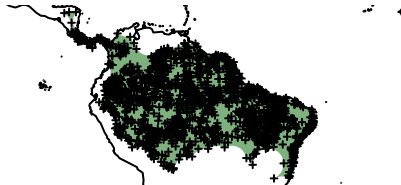

**Paropsia**

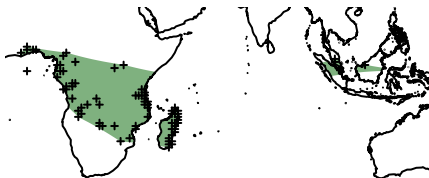

**Pausandra**

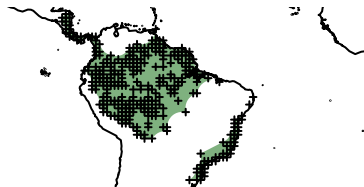

**Pausinystalia**

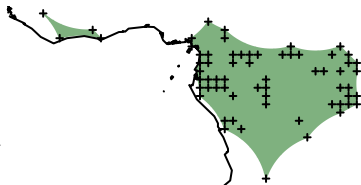

**Payena**

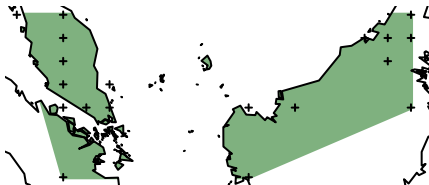

**Peltogyne**

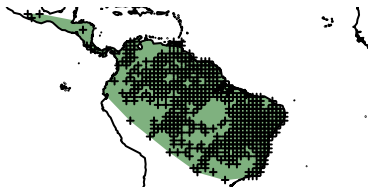

**Pentaclethra**

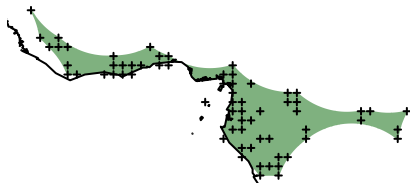

**Pentaclethra**

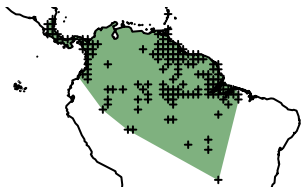

**Pentadesma**

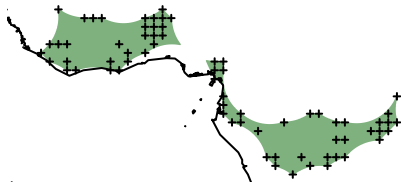

**Perebea**

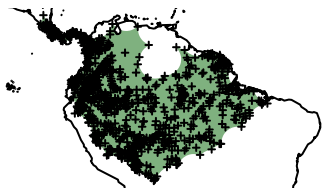

**Petersianthus**

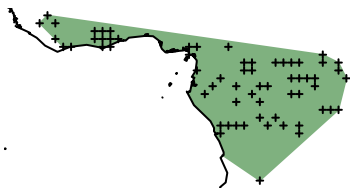

**Phyllocosmus**

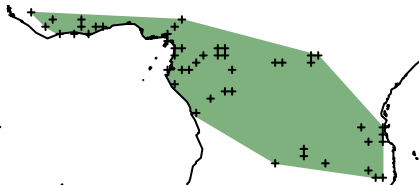

**Picalima**

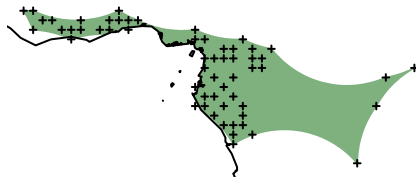

**Pimelodendron**

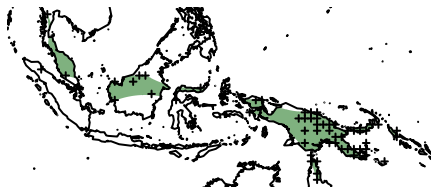

**Piptadeniastrum**

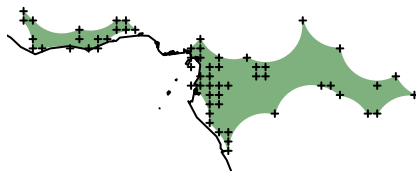

**Pithecellobium**

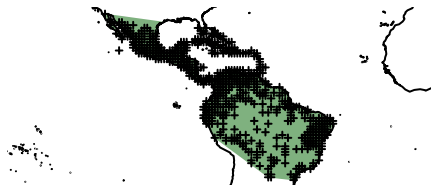

**Pithecellobium**

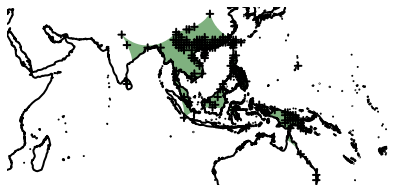

**Placodiscus**

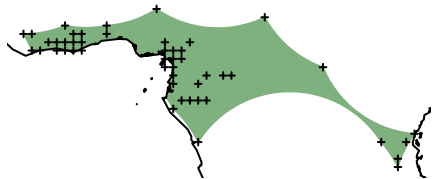

**Plagiostyles**

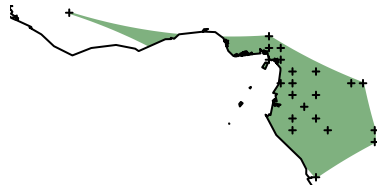

**Platymiscium**

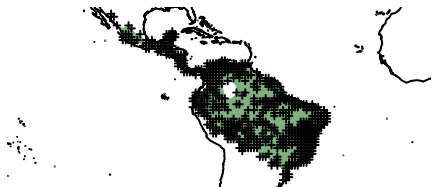

**Platypodium**

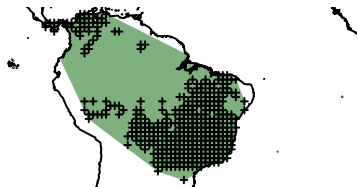

**Pleurothyrium**

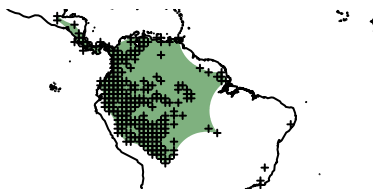

**Poecilanthe**

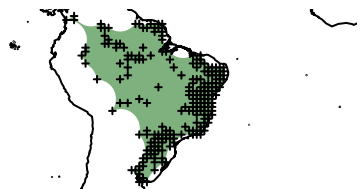

**Polyalthia**

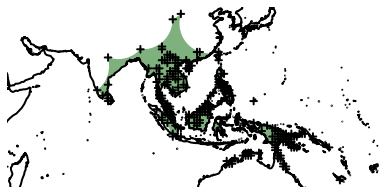

**Polyalthia**

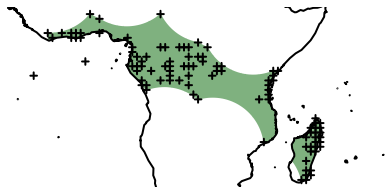

**Poraqueiba**

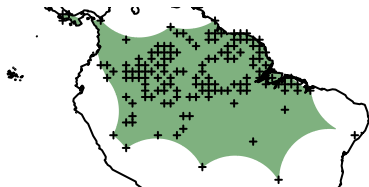

**Porterandia**

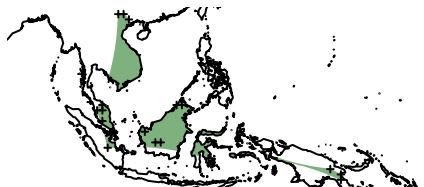

**Poulsenia**

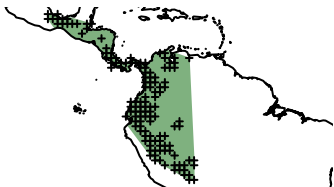

**Pourouma**

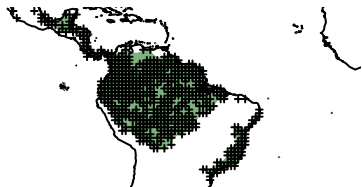



Pouteria

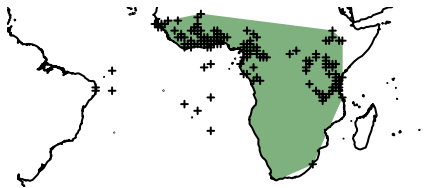

Pouteria

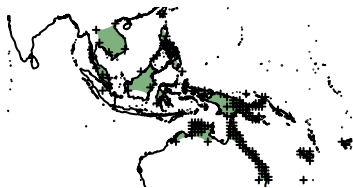

Pouteria

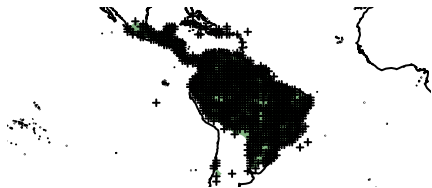

Pradosia

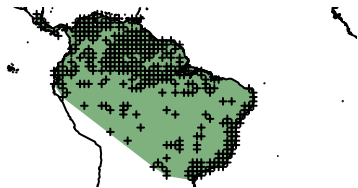

Prioria

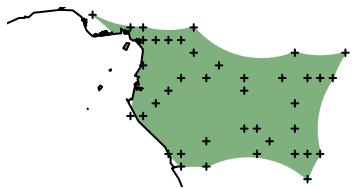

Prioria

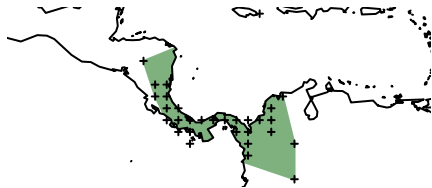

**Protium**

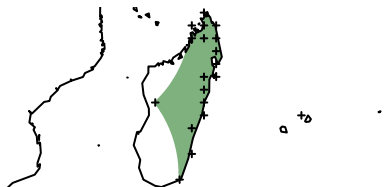

**Protium**

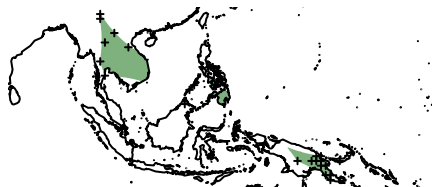

**Protium**

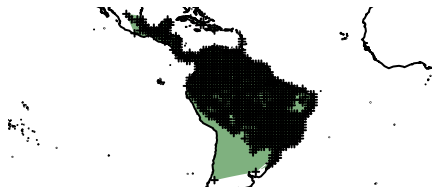

**Protomegabaria**

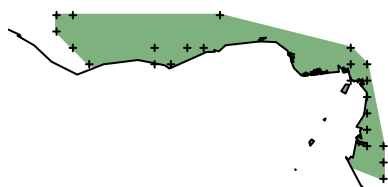

**Pseudolachnostylis**

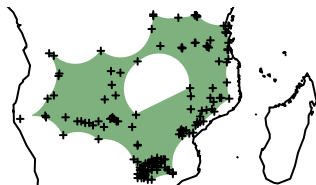

**Pseudolmedia**

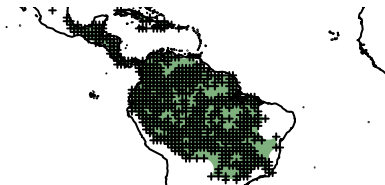

Supplement: MOESM8 [file 41598_2024_84367_MOESM8_ESM.pdf]
