# Supplementary material for: Large range sizes link fast life histories with high species richness across wet tropical tree floras
Source: Springer Nature journal article supplement (doi:10.1038/s41598-024-84367-3), 2025-02-07

**Dalbergia**

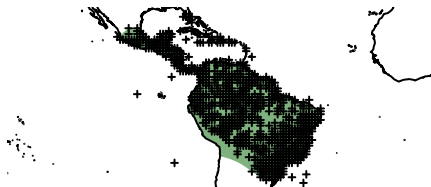

**Dalbergia**

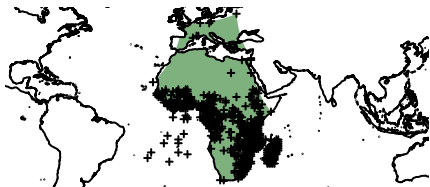

**Daniellia**

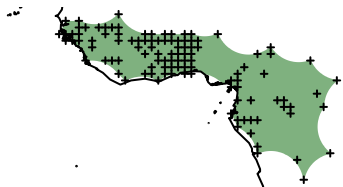

**Dasylepis**

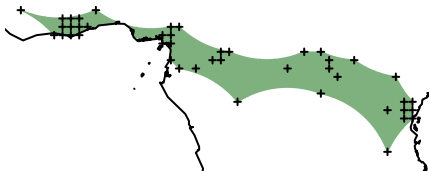

**Dehaasia**

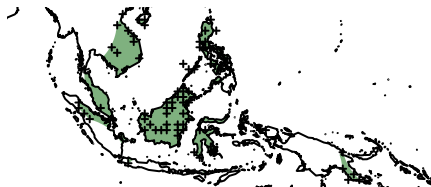

**Dendrobangia**

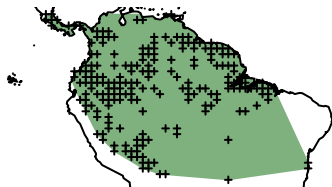

Dendropanax

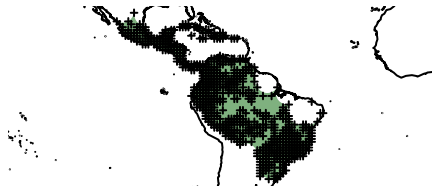

Dendropanax

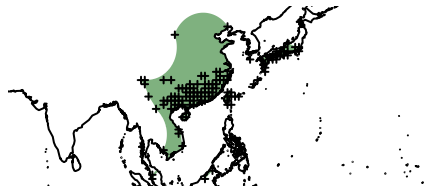

Desbordesia

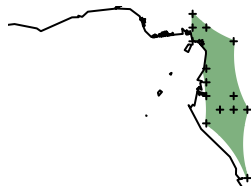

Desplatsia

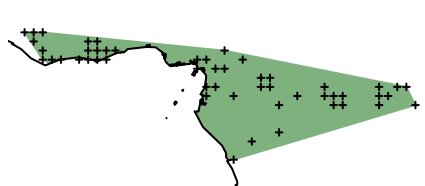

Dialium

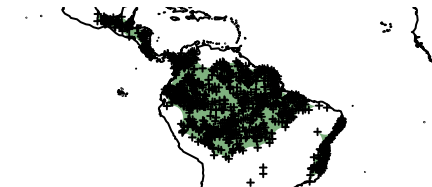

Dialium

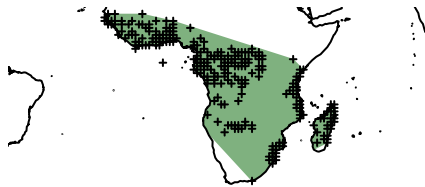

**Dialium**

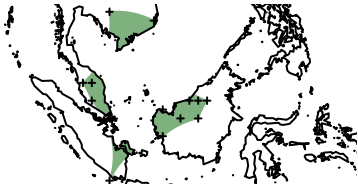

**Dichostemma**

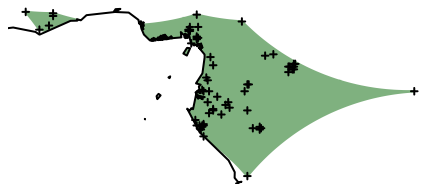

**Dicorynia**

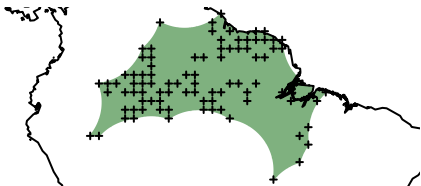

**Dicymbe**

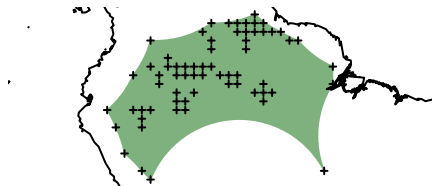

**Dicypellium**

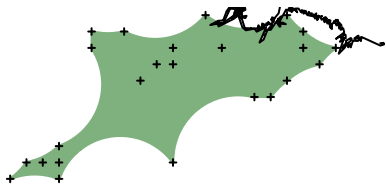

**Dillenia**

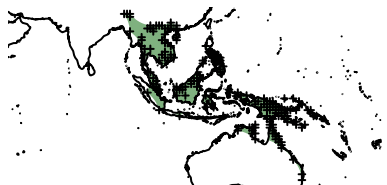

**Diogoa**

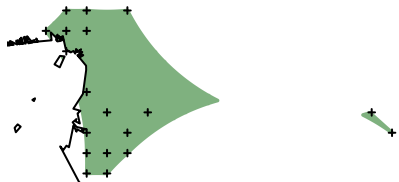

**Diospyros**

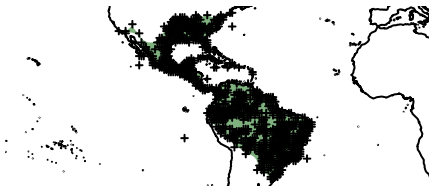

**Diospyros**

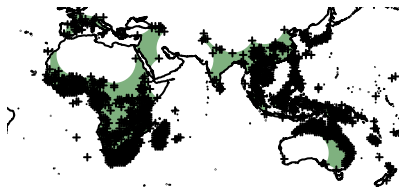

**Diplorhynchus**

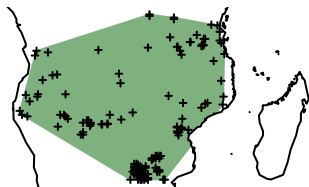

**Diplospora**

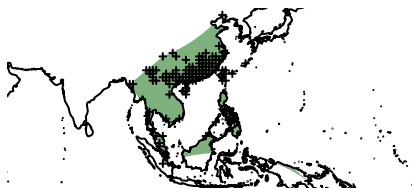

**Diplotropis**

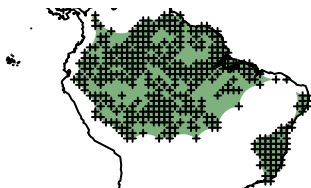

**Dipterocarpus**

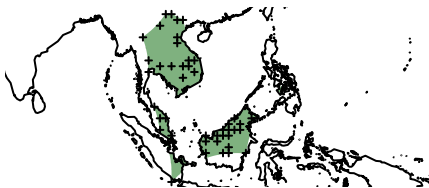

**Dipteryx**

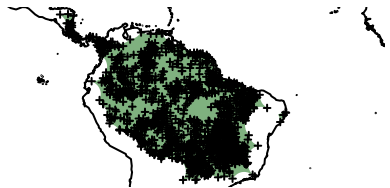

**Discoglyprema**

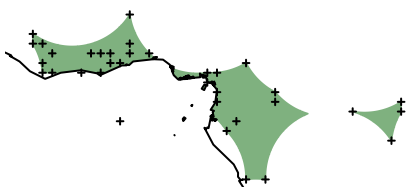

**Distemonanthus**

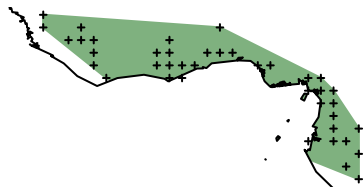

**Dryobalanops**

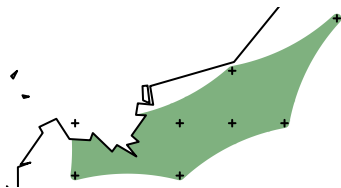

**Drypetes**

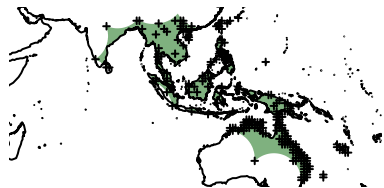

Drypetes

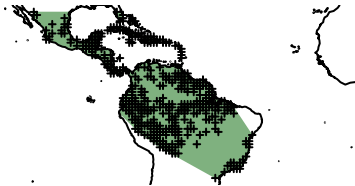

Drypetes

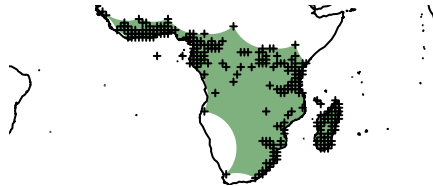

Duguetia

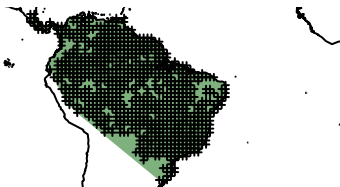

Duguetia

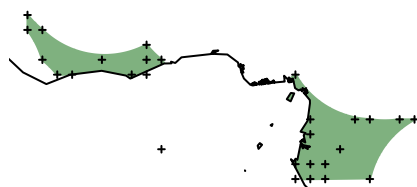

Durio

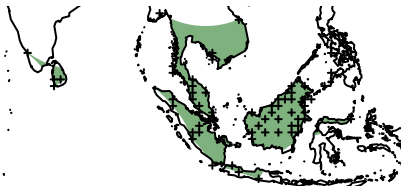

Duroia

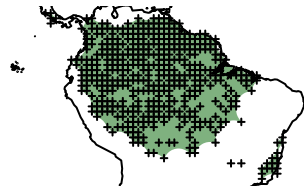

Dyera

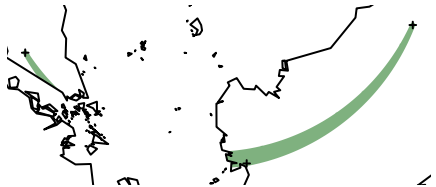

Dysoxylum

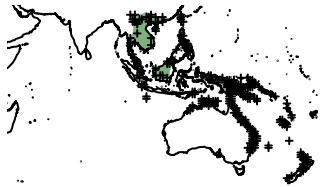

Ecclinusa

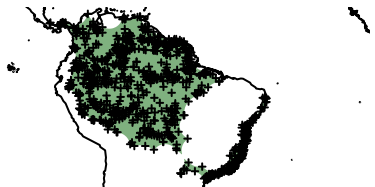

Elaeocarpus

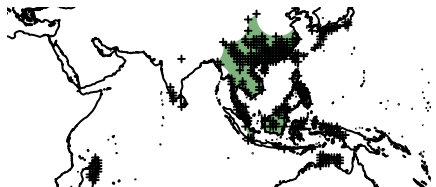

Elaeocarpus

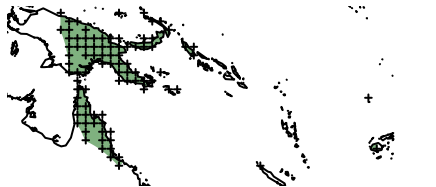

Elateriospermum

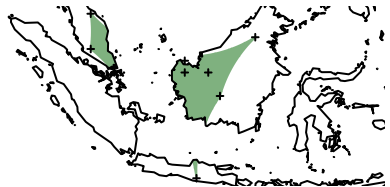

**Endlicheria**

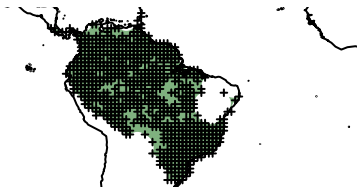

**Endopleura**

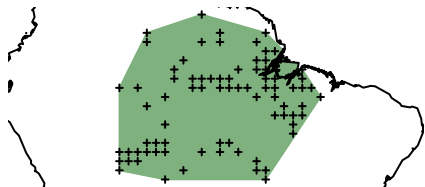

**Englerophytum**

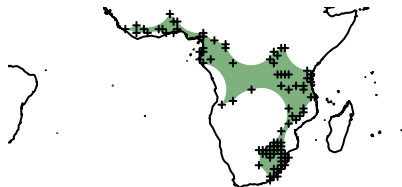

**Enicosanthum**

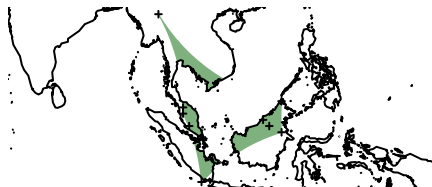

**Entandrophragma**

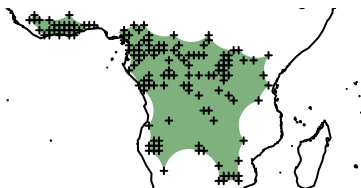

**Eperua**

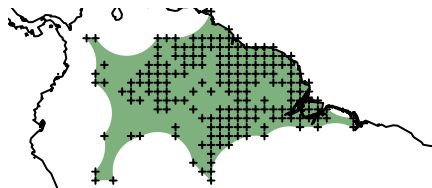



Eriocoelum

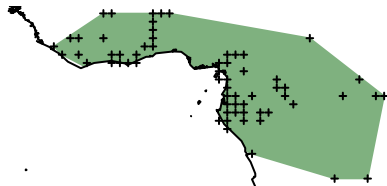

Eriotheca

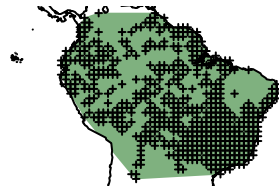

Erisma

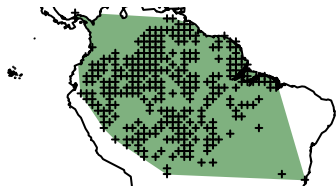

Erythrina

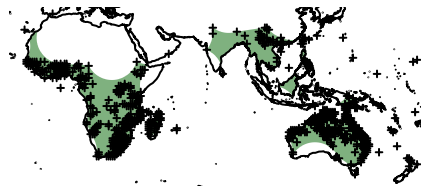

Erythrina

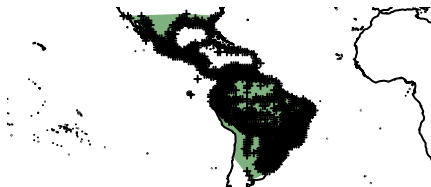

Erythropheum

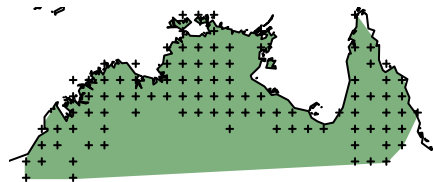

**Erythrophleum**

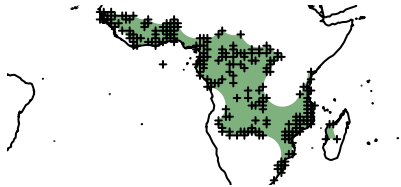

**Eschweilera**

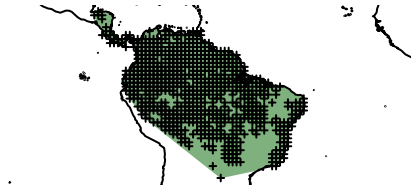

**Eugenia**

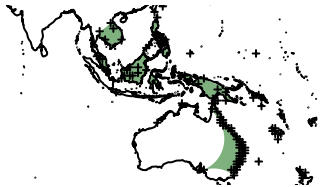

**Eugenia**

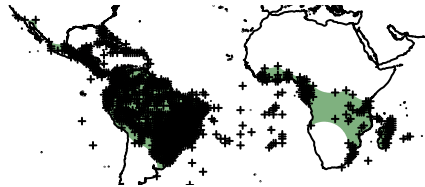

**Eusideroxylon**

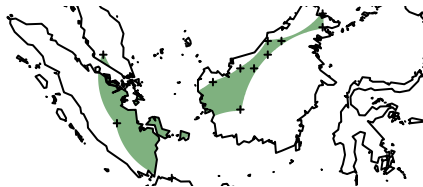

**Euterpe**

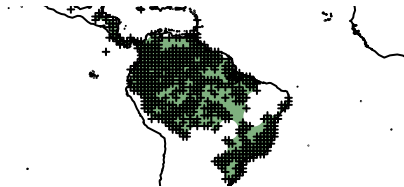

Supplement: MOESM4 [file 41598_2024_84367_MOESM4_ESM.pdf]
