# Supplementary material for: Large range sizes link fast life histories with high species richness across wet tropical tree floras
Source: Springer Nature journal article supplement (doi:10.1038/s41598-024-84367-3), 2025-02-07

Jacaranda

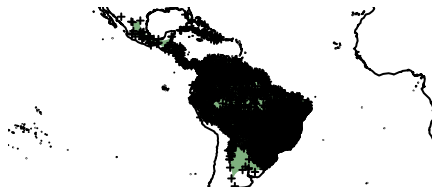

Jacaratia

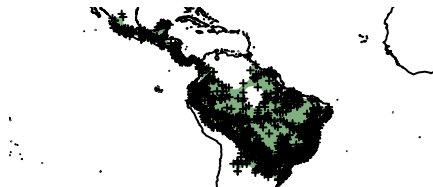

Julbernardia

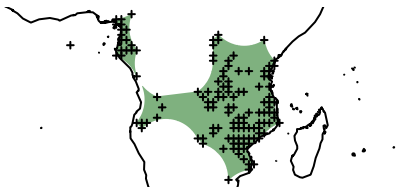

Khaya

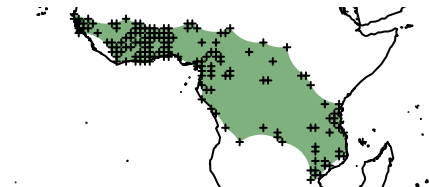

Klaineanthus

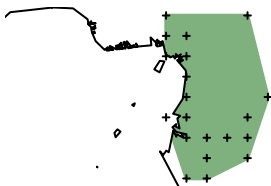

Klainedoxa

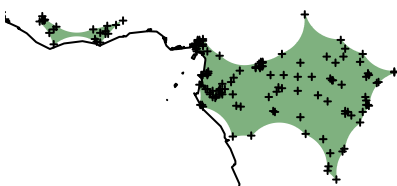

Knema

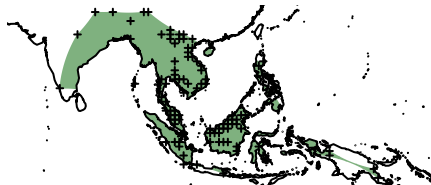

Koiloceras

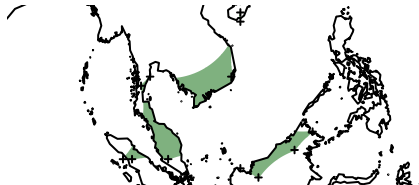

Koompassia

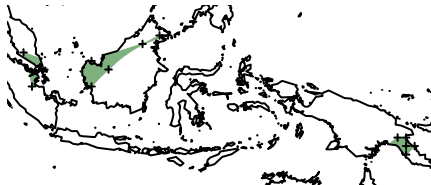

Lacistema

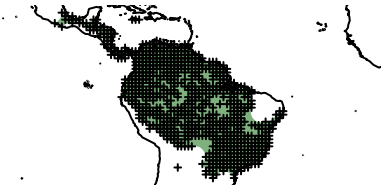

Lacmellea

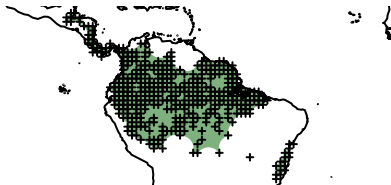

Laetia

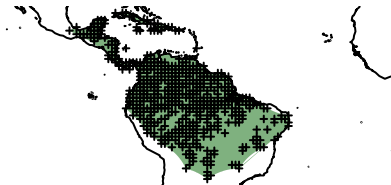

Lanea

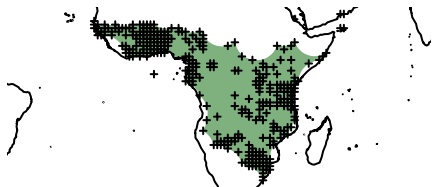

Lansium

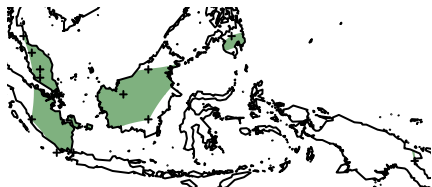

Lasiodiscus

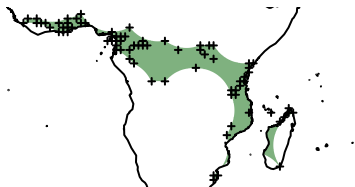

Lecythis

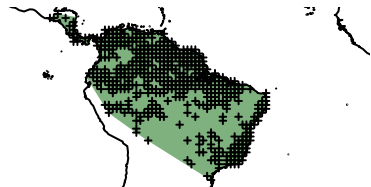

Leonia

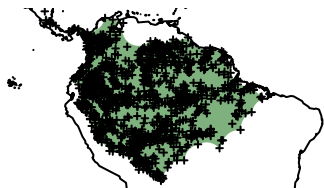

Lepidobotrys

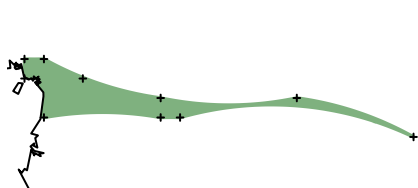

**Lepisanthes**

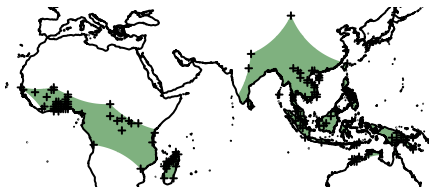

**Leptaulus**

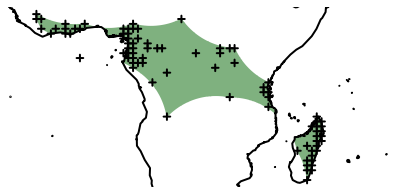

**Leptonychia**

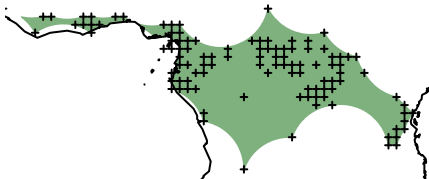

**Leptonychia**

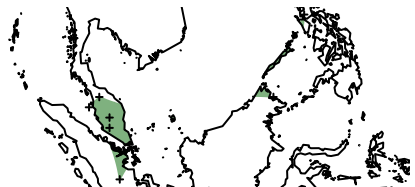

**Licania**

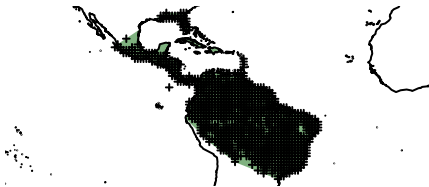

**Licaria**

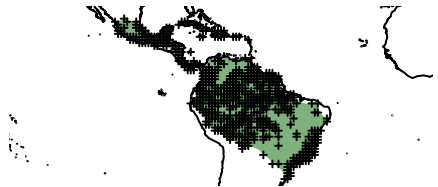

Lindackeria

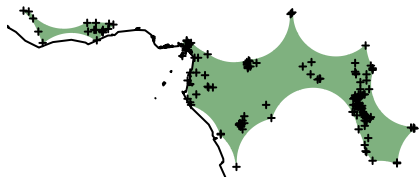

Lindackeria

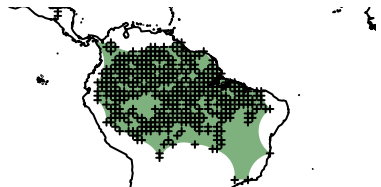

Lithocarpus

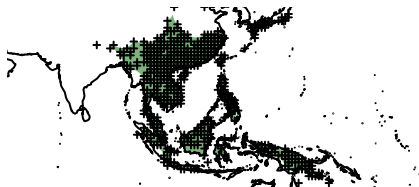

Litsea

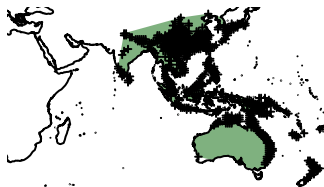

Litsea

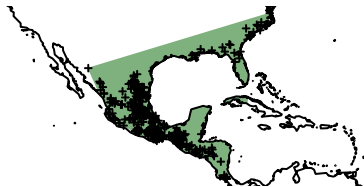

Lonchocarpus

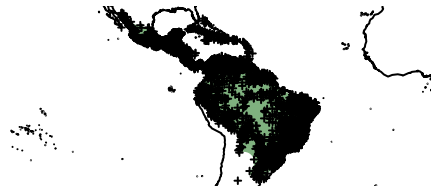

**Lonchocarpus**

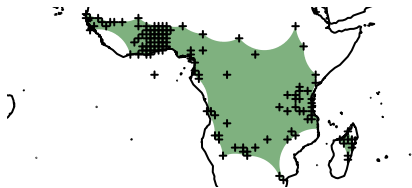

**Lophira**

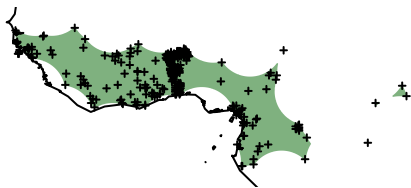

**Lovoa**

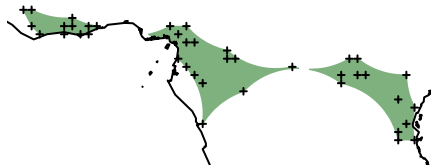

**Luehea**

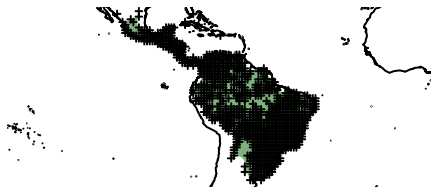

**Lueheopsis**

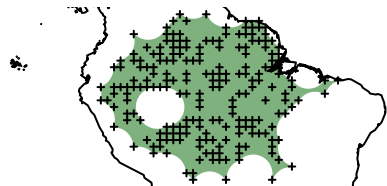

**Lunania**

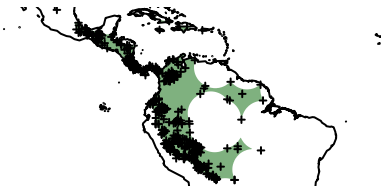

**Lychnodiscus**

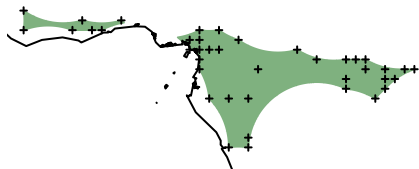

**Mabea**

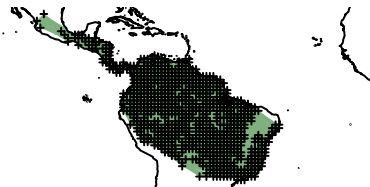

**Macaranga**

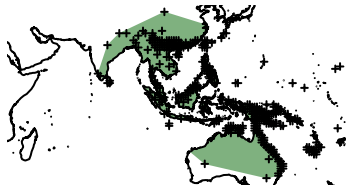

**Macaranga**

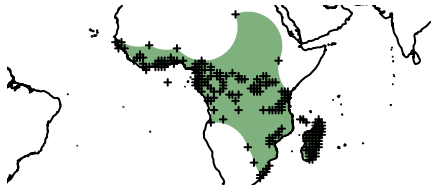

**Maclurodendron**

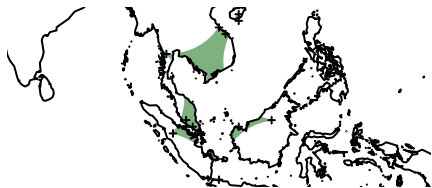

**Macrolobium**

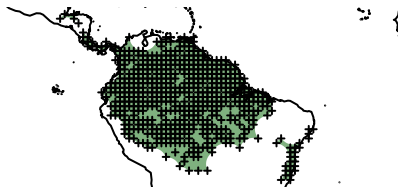

**Madhuca**

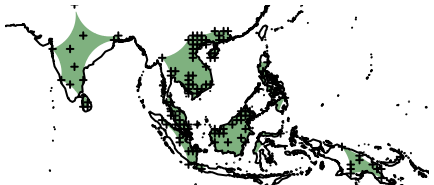

**Maesobotrya**

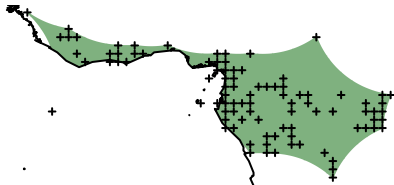

**Maesopsis**

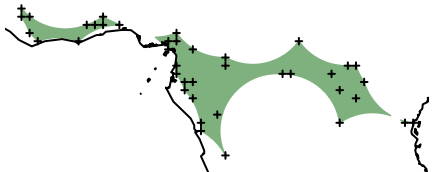

**Magnolia**

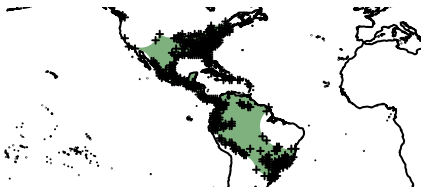

**Magnolia**

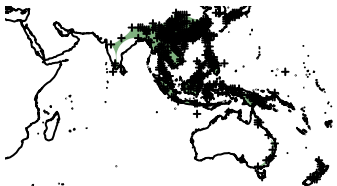

**Mallotus**

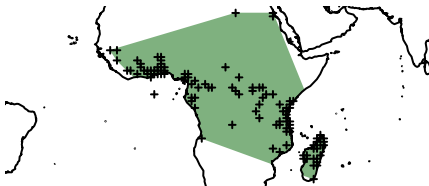



**Mallotus**

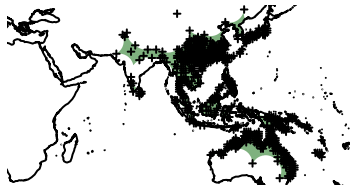

**Malmea**

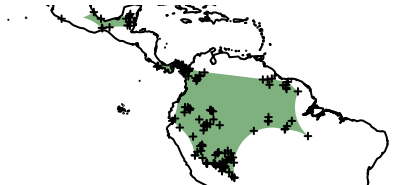

**Mammea**

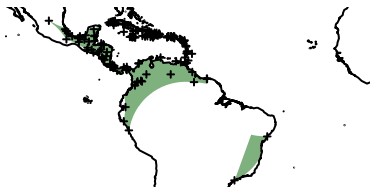

**Mangifera**

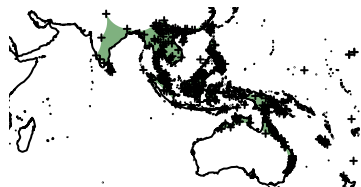

**Manilkara**

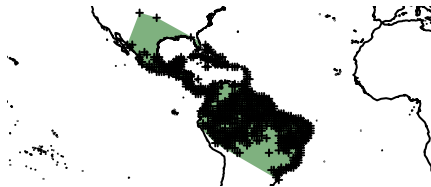

**Manilkara**

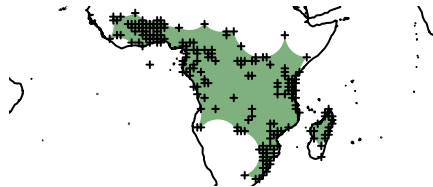

Manilkara

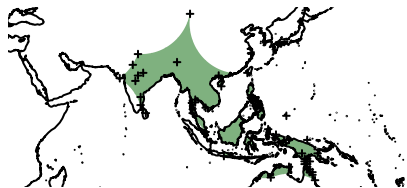

Maprounea

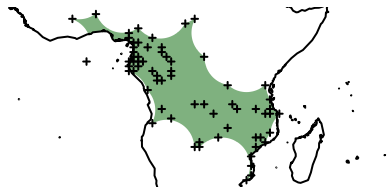

Maprounea

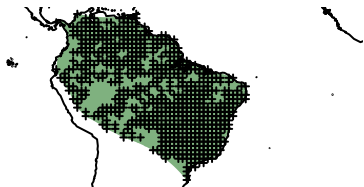

Maquira

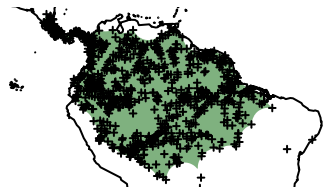

Maranthes

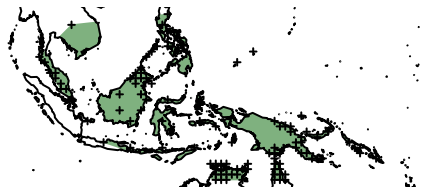

Maranthes

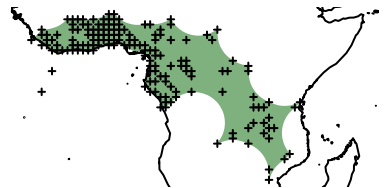

Supplement: MOESM6 [file 41598_2024_84367_MOESM6_ESM.pdf]
