# Supplementary material for: Large range sizes link fast life histories with high species richness across wet tropical tree floras
Source: Springer Nature journal article supplement (doi:10.1038/s41598-024-84367-3), 2025-02-07

**Abarema**

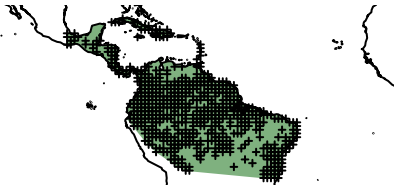

**Adelia**

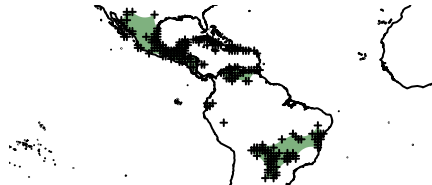

**Adinandra**

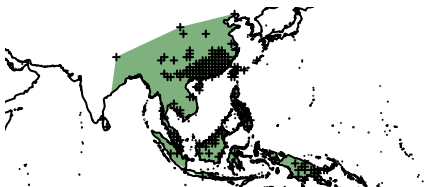

**Afrostryax**

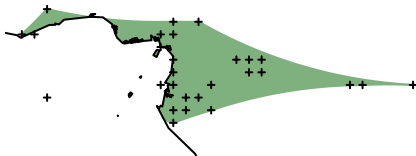

**Afzelia**

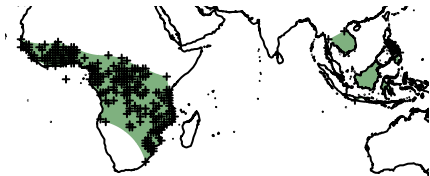

**Aglaia**

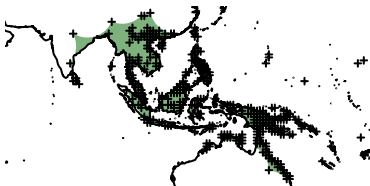

Aidia

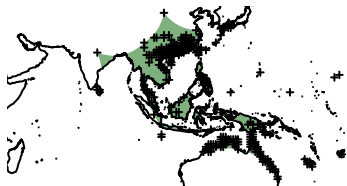

Aidia

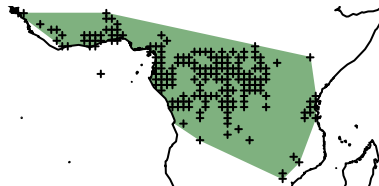

Alangium

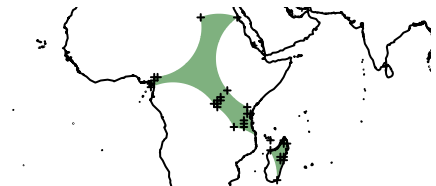

Alangium

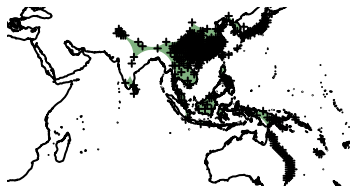

Albizia

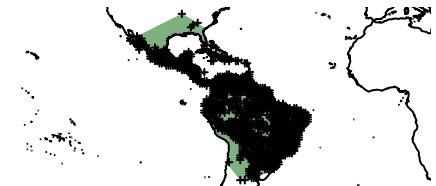

Albizia

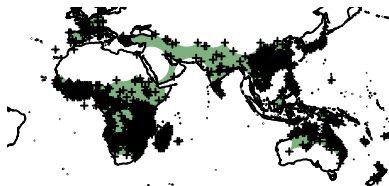

**Alchornea**

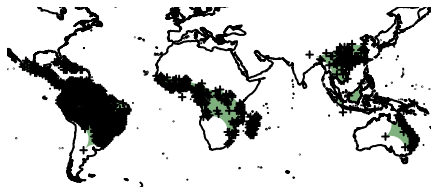

**Alchornea**

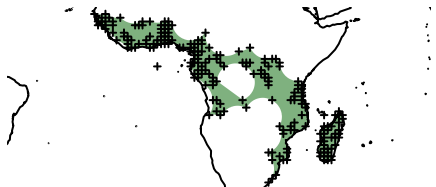

**Alchornea**

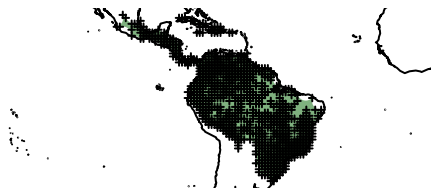

**Allanblackia**

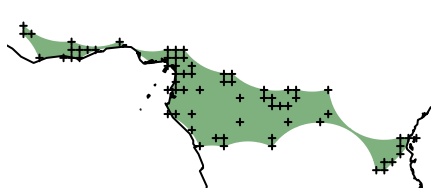

**Allophylus**

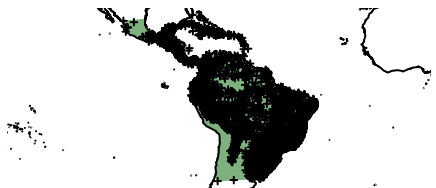

**Allophylus**

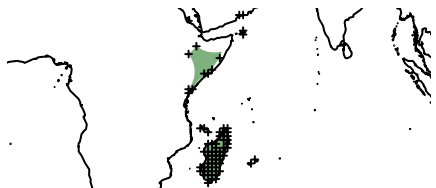

**Allophylus**

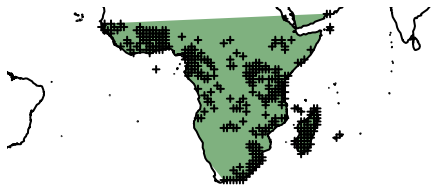

**Alphonsea**

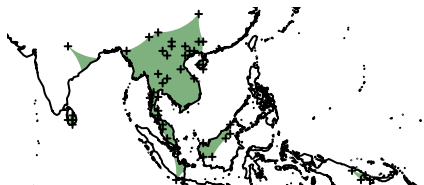

**Alseis**

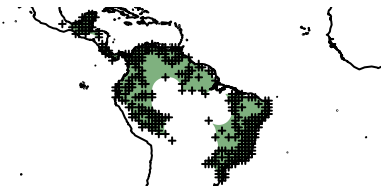

**Alseodaphne**

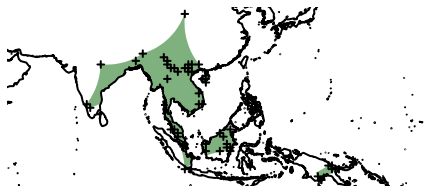

**Alstonia**

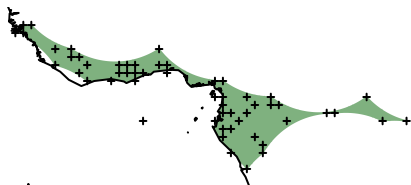

**Alstonia**

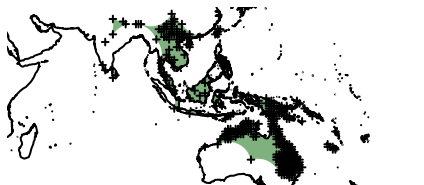



Alstonia

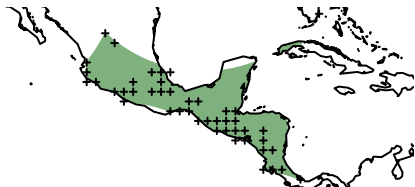

Amaioua

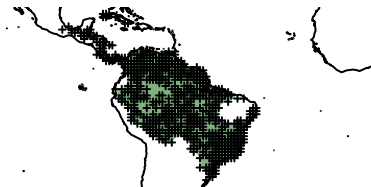

Amanoa

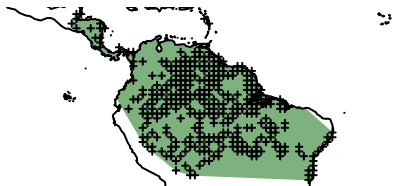

Amanoa

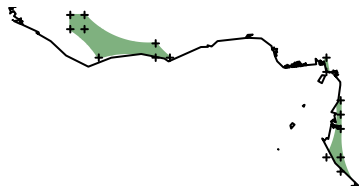

Ambelania

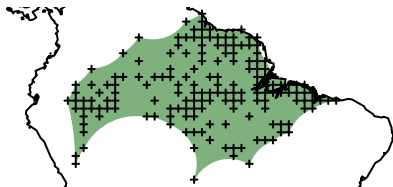

Ampelocera

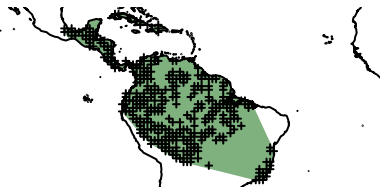

Amphimas

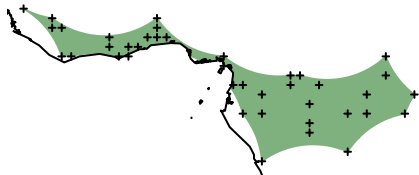

Amphirrhox

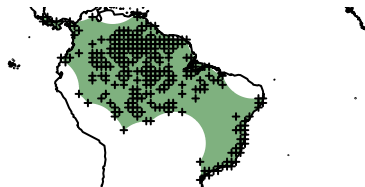

Anacardium

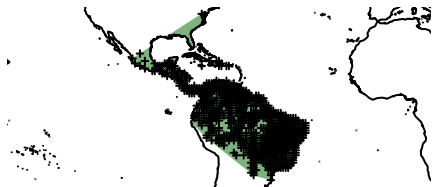

Anaxagorea

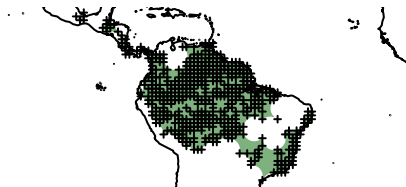

Anaxagorea

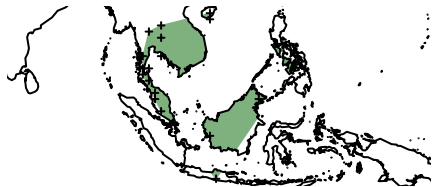

Andira

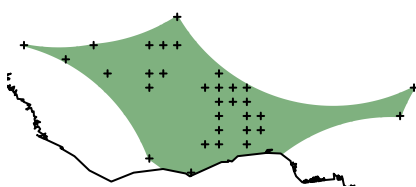

Andira

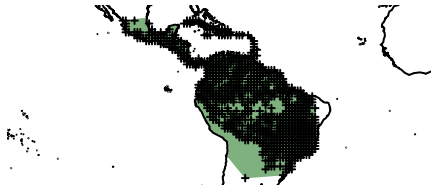

Angylocalyx

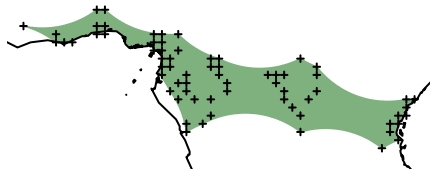

Aniba

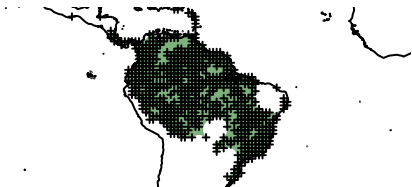

Anisophyllea

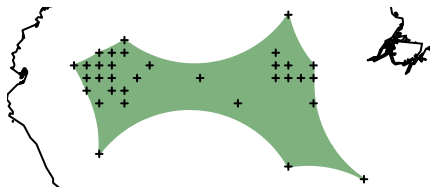

Anisophyllea

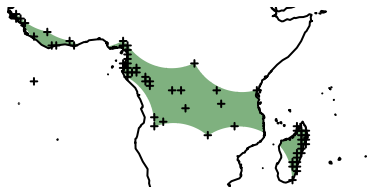

Anisophyllea

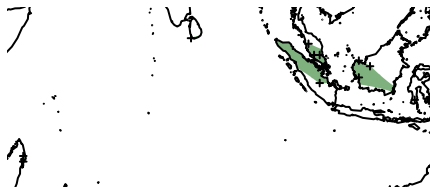

Anisoptera

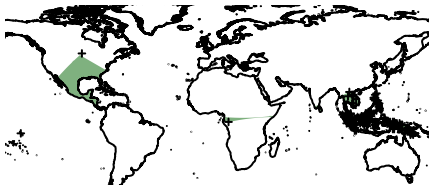

Annickia

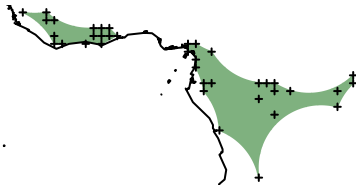

Annona

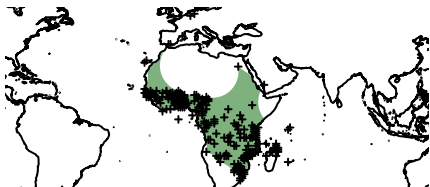

Annona

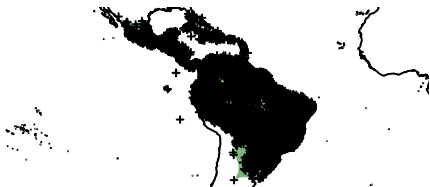

Anonidium

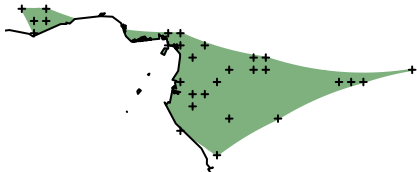

Anopyxis

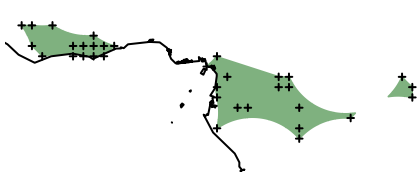

**Anthonotha**

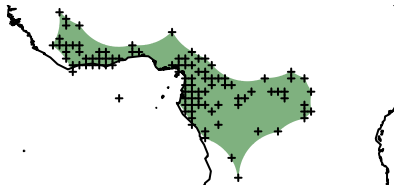

**Antiaris**

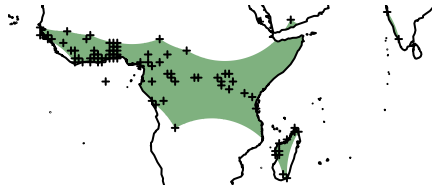

**Antidesma**

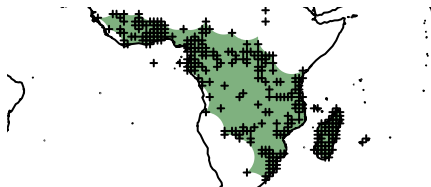

**Antidesma**

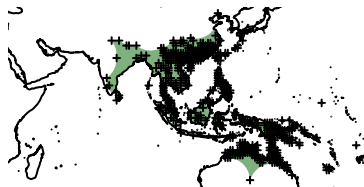

**Aoranthe**

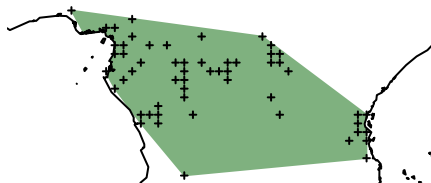

**Aparisthium**

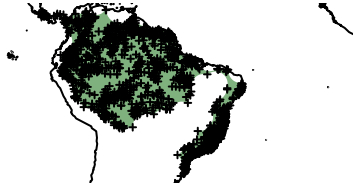

**Apeiba**

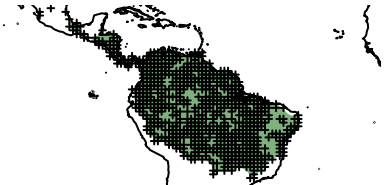

**Aporosa**

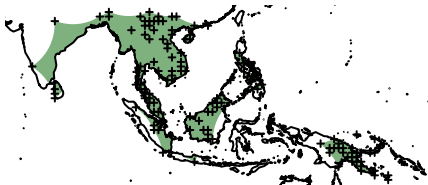

**Archidendron**

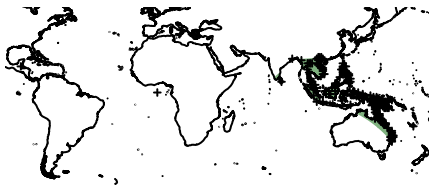

**Artocarpus**

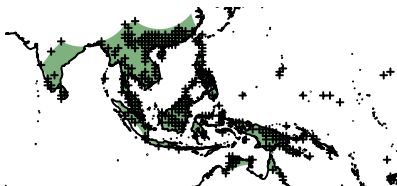

**Aspidosperma**

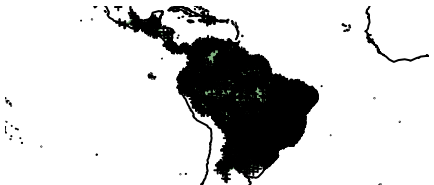

**Astrocaryum**

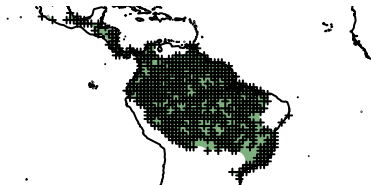

Supplement: MOESM1 [file 41598_2024_84367_MOESM1_ESM.pdf]
