# Supplementary material for: Large range sizes link fast life histories with high species richness across wet tropical tree floras
Source: Springer Nature journal article supplement (doi:10.1038/s41598-024-84367-3), 2025-02-07

**Pseudoptadenia**

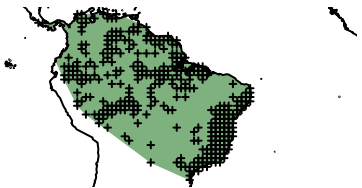

**Pseudospondias**

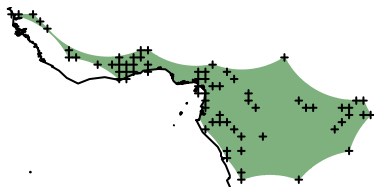

**Pseudoxandra**

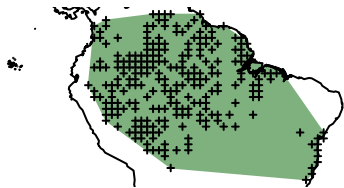

**Psidium**

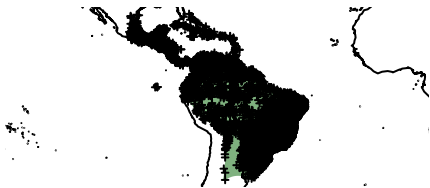

**Psydrax**

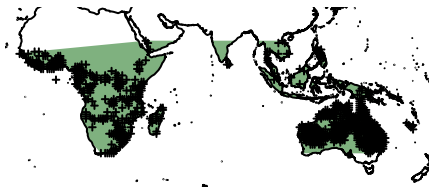

**Pteleopsis**

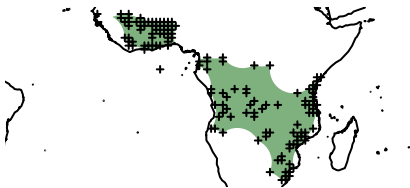

Pternandra

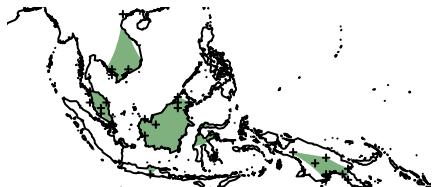

Pterocarpus

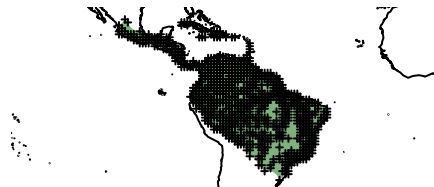

Pterocarpus

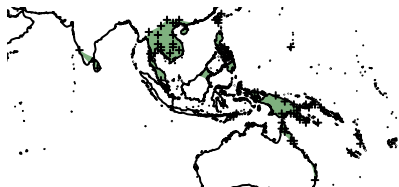

Pterocarpus

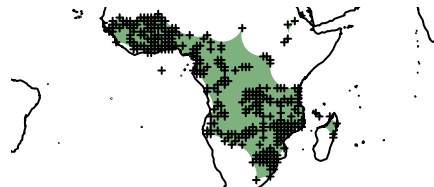

Pterygota

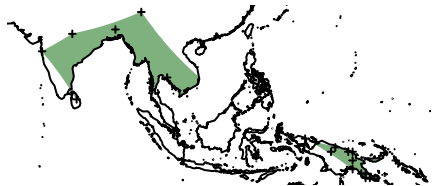

Pterygota

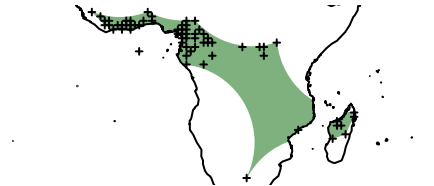

**Pterygota**

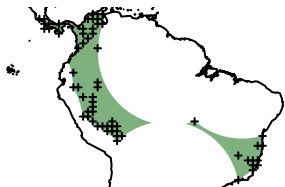

**Ptychopyxis**

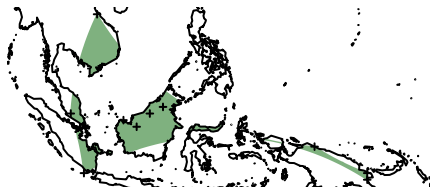

**Pycnanthus**

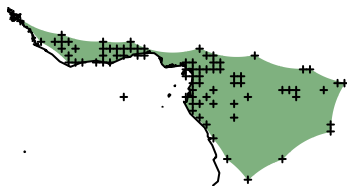

**Qualea**

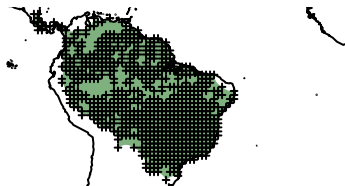

**Quararibea**

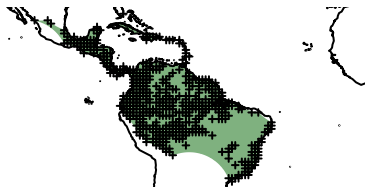

**Quassia**

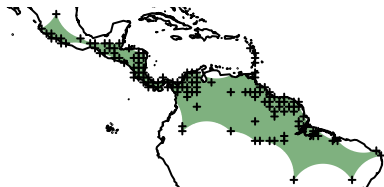

Quassia

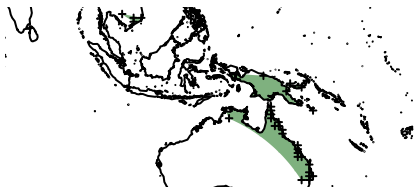

Quassia

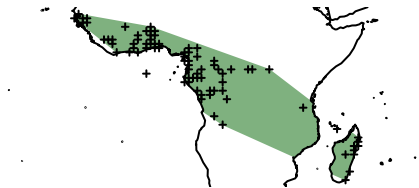

Quiina

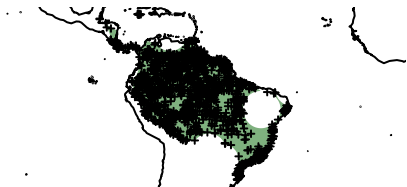

Rauvolfia

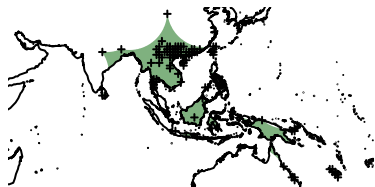

Rauvolfia

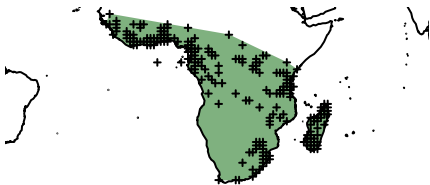

Rauvolfia

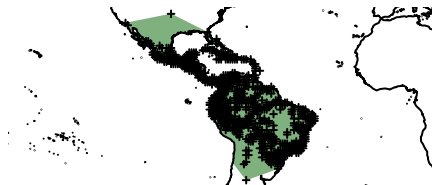

**Rawsonia**

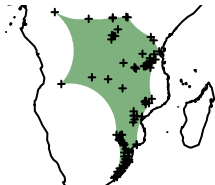

**Rhabdophyllum**

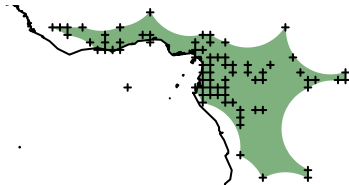

**Rhodamnia**

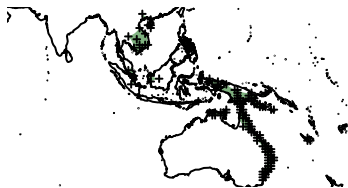

**Rhodostemonodaphne**

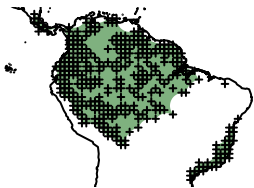

**Ricinodendron**

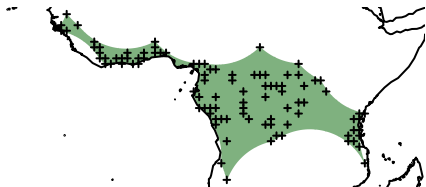

**Rinorea**

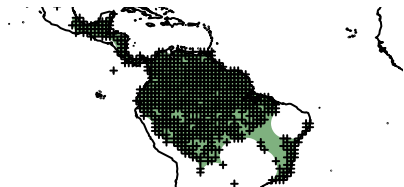

Rinorea

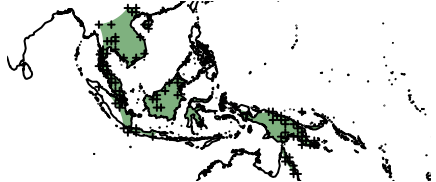

Rinorea

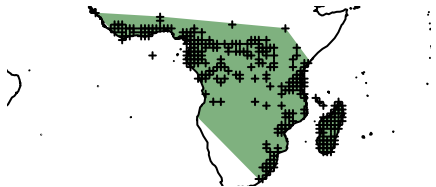

Rinoreocarpus

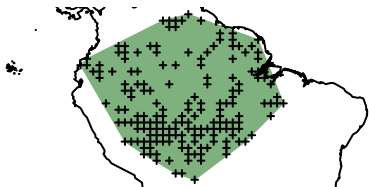

Rollinia

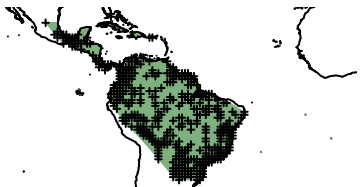

Rothmannia

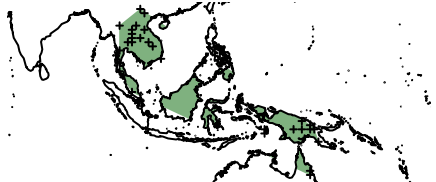

Rothmannia

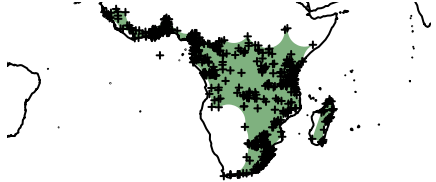

Roucheria

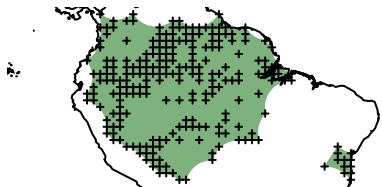

Ruizodendron

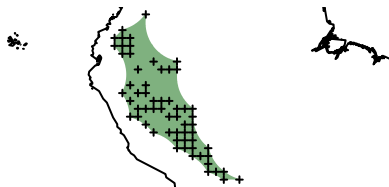

Sacoglottis

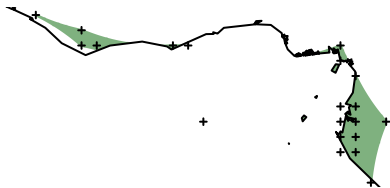

Sacoglottis

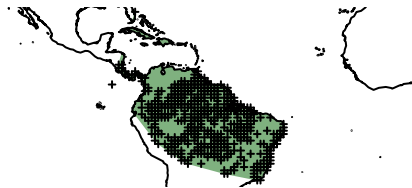

Sagotia

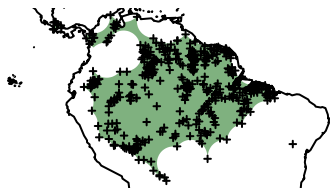

Santiria

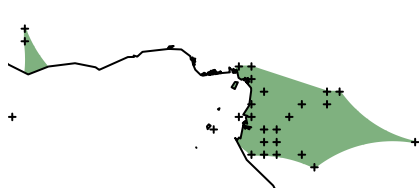

Santiria

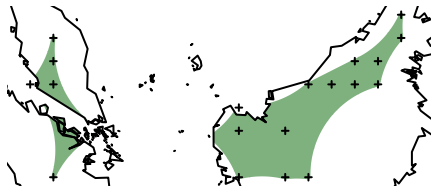

Sapium

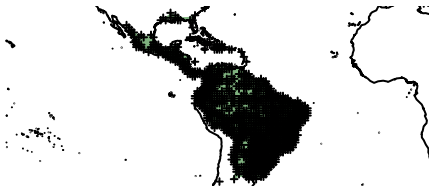

Sapium

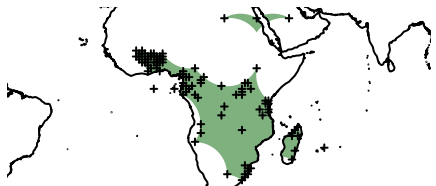

Saraca

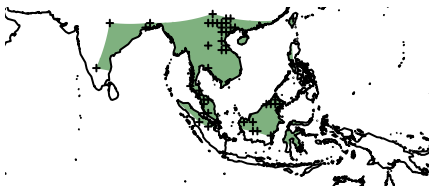

Sarcaulus

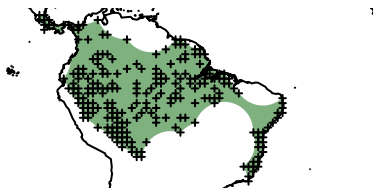

Sarcotheca

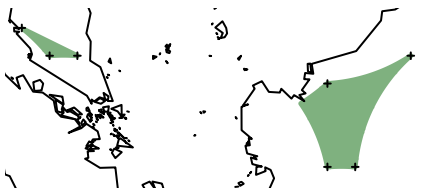



**Scaphium**

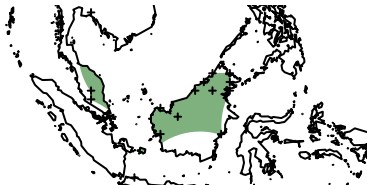

**Scleronema**

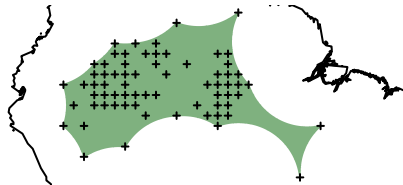

**Scorodophloeus**

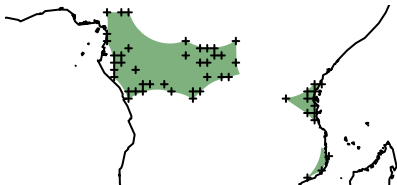

**Scottellia**

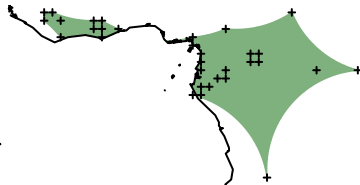

**Scytopetalum**

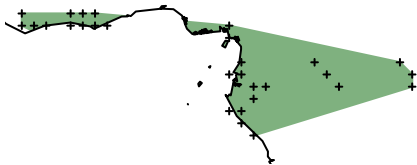

**Shorea**

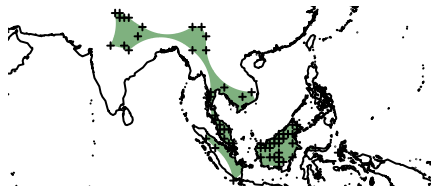

Simaba

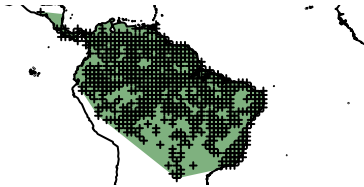

Simarouba

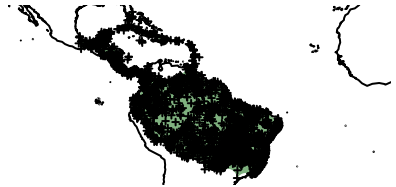

Sindora

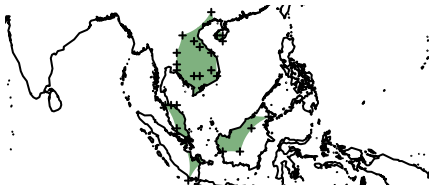

Siparuna

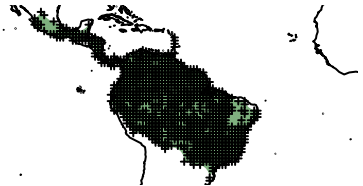

Sloanea

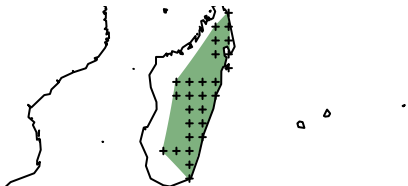

Sloanea

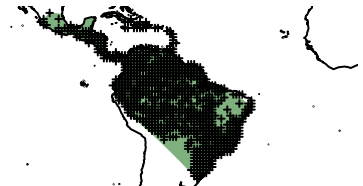

Supplement: MOESM9 [file 41598_2024_84367_MOESM9_ESM.pdf]
