# Supplementary material for: Large range sizes link fast life histories with high species richness across wet tropical tree floras
Source: Springer Nature journal article supplement (doi:10.1038/s41598-024-84367-3), 2025-02-07

**Astronium**

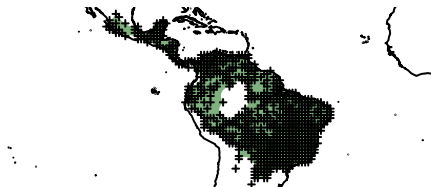

**Attalea**

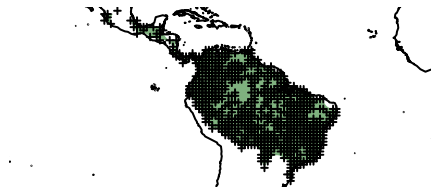

**Atuna**

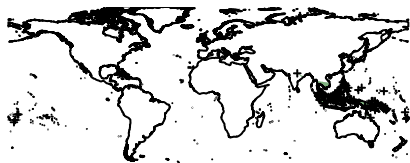

**Aucoumea**

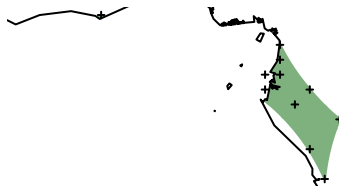

**Aulacocalyx**

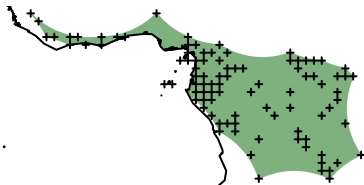

**Baccaurea**

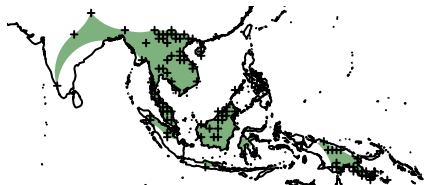

**Baphia**

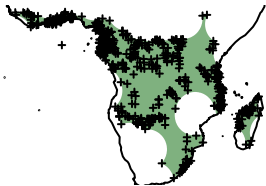

**Barringtonia**

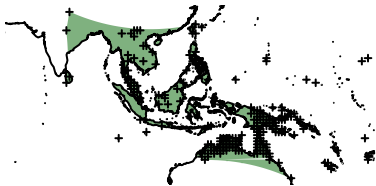

**Barringtonia**

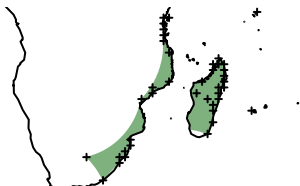

**Barteria**

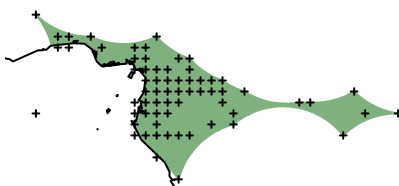

**Batocarpus**

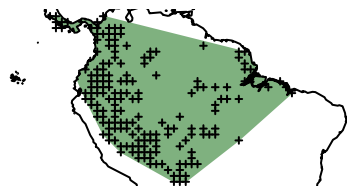

**Bauhinia**

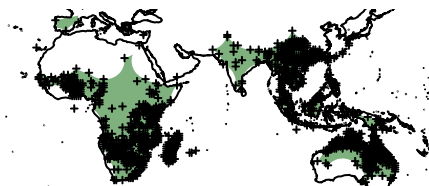

**Bauhinia**

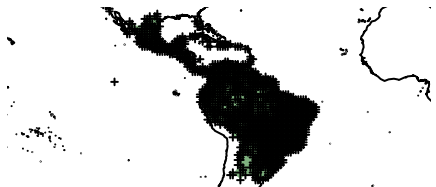

**Beilschmiedia**

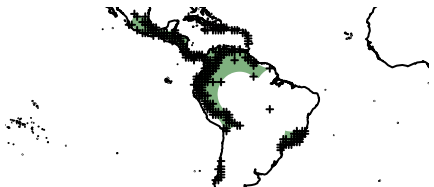

**Beilschmiedia**

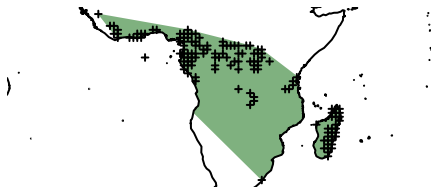

**Beilschmiedia**

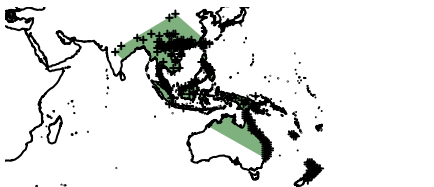

**Berlinia**

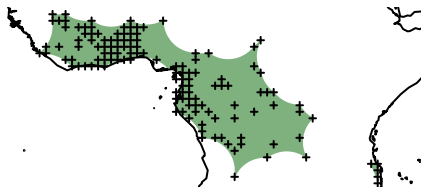

**Bhesa**

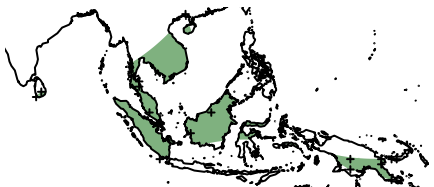

**Bixa**

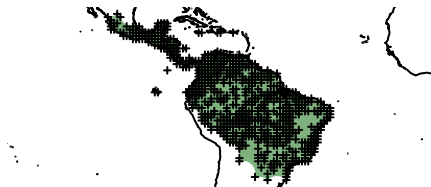

**Blighia**

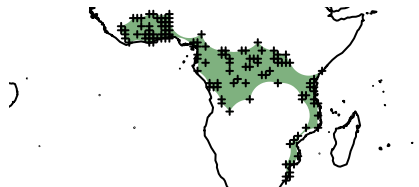

**Blumeodendron**

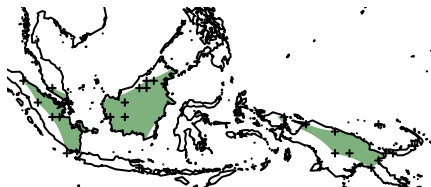

**Bocageopsis**

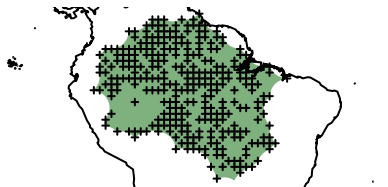

**Bocoa**

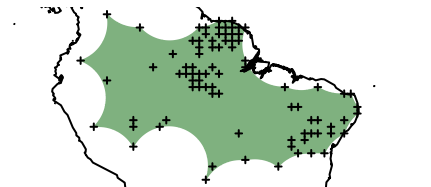

**Brachystegia**

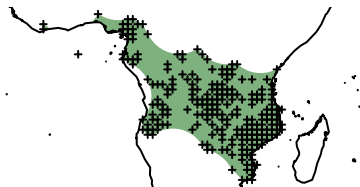



**Bridelia**

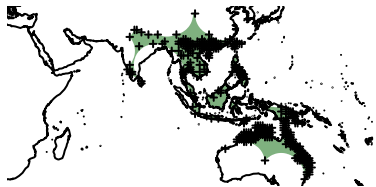

**Bridelia**

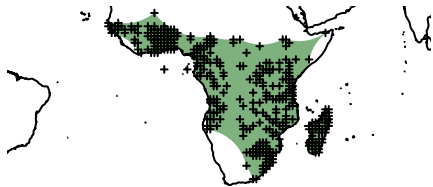

**Brosimum**

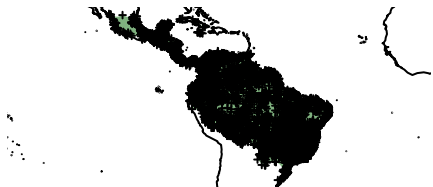

**Buchanania**

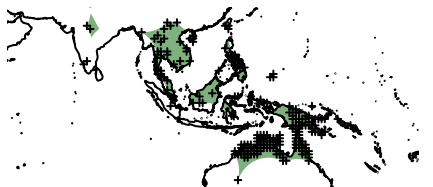

**Buchenavia**

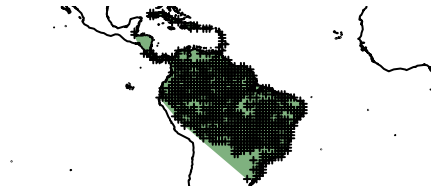

**Burkea**

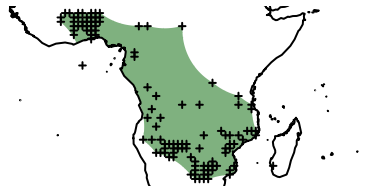

**Bussea**

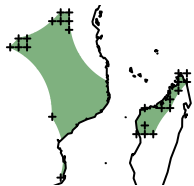

**Bussea**

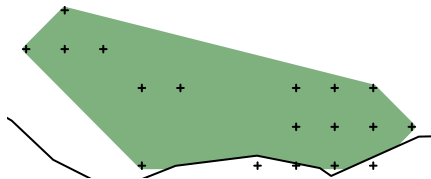

**Byrsonima**

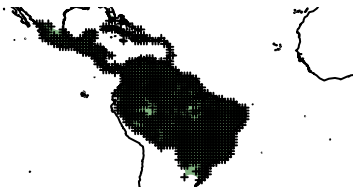

**Calatola**

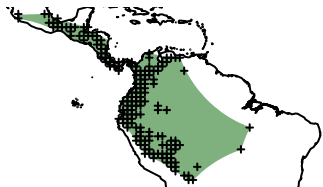

**Calophyllum**

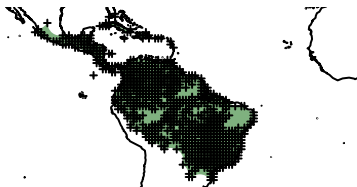

**Calophyllum**

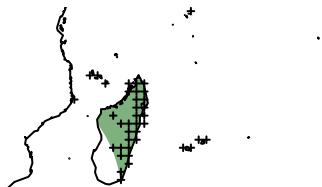

**Calophyllum**

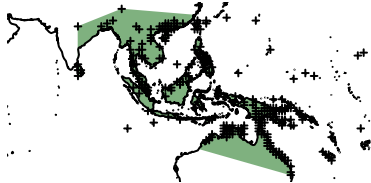

**Calpocalyx**

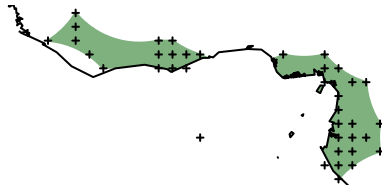

**Calyptranthes**

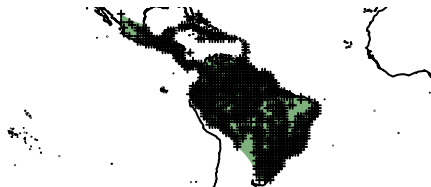

**Canarium**

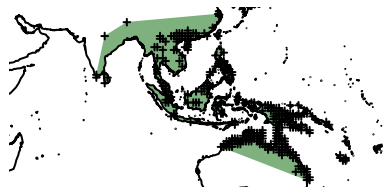

**Canarium**

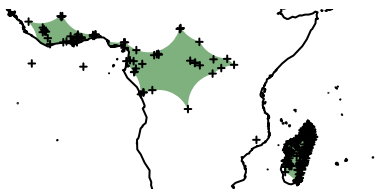

**Canthium**

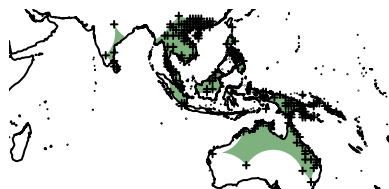

Canthium

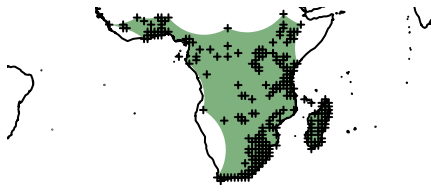

Capirona

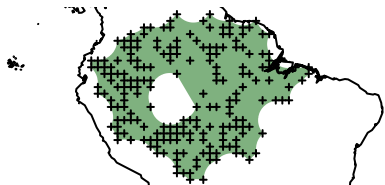

Caraipa

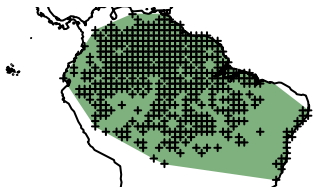

Carallia

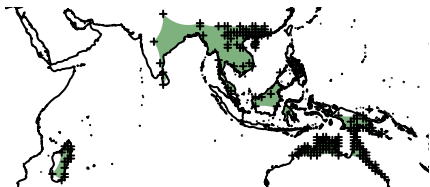

Carapa

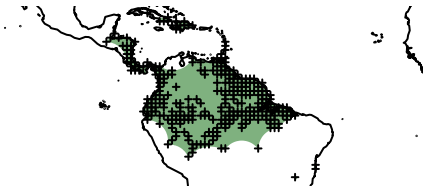

Carapa

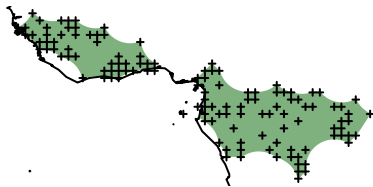

Caryocar

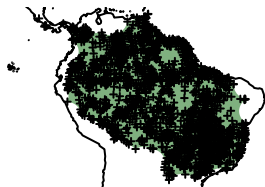

Casearia

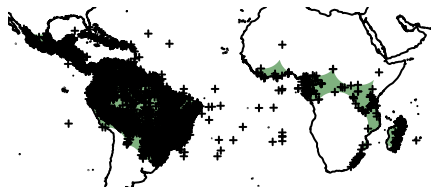

Casearia

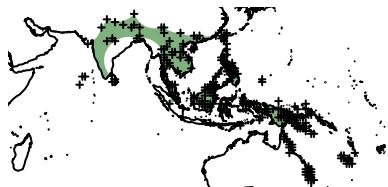

Cassipourea

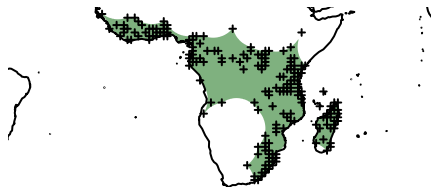

Cassipourea

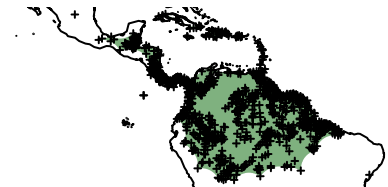

Castanopsis

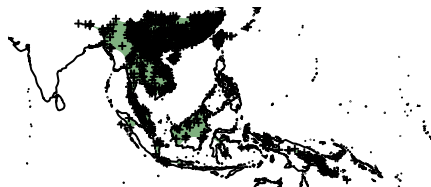

Castilla

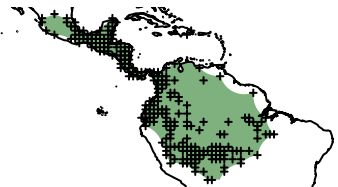

Catostemma

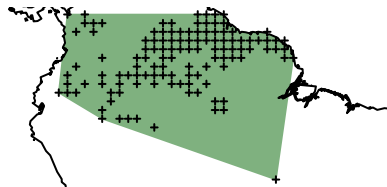

Cecropia

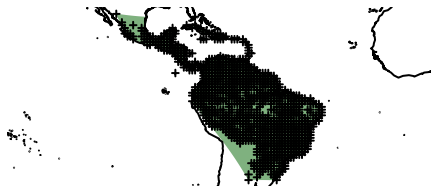

Ceiba

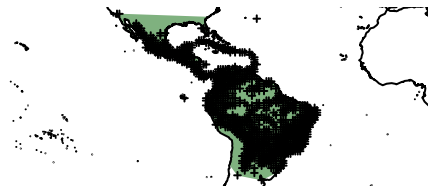

Celtis

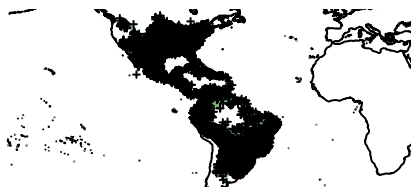

Celtis

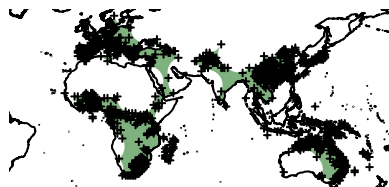

Supplement: MOESM2 [file 41598_2024_84367_MOESM2_ESM.pdf]
