# Supplementary material for: Large range sizes link fast life histories with high species richness across wet tropical tree floras
Source: Springer Nature journal article supplement (doi:10.1038/s41598-024-84367-3), 2025-02-07

**Ficus**

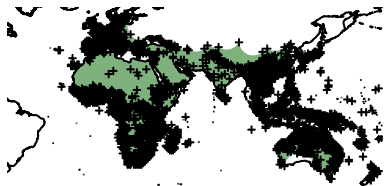

**Ficus**

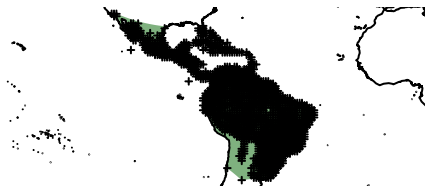

**Funtumia**

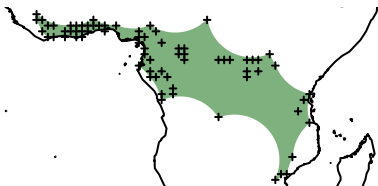

**Fusaea**

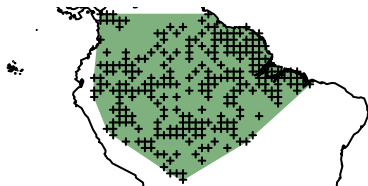

**Garcinia**

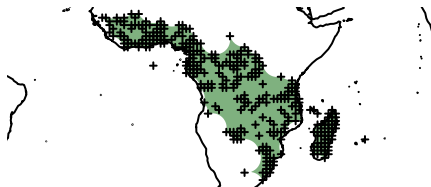

**Garcinia**

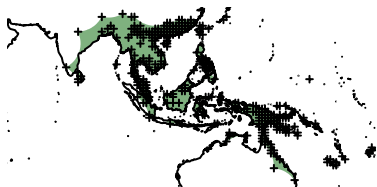

**Garcinia**

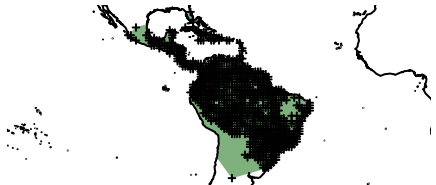

**Geissospermum**

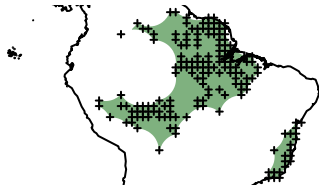

**Gilbertiodendron**

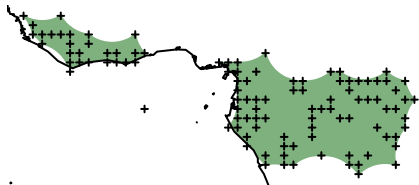

**Gironniera**

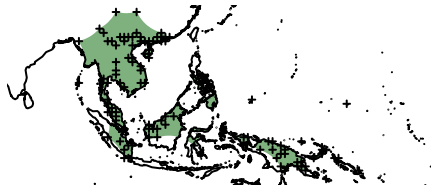

**Gluta**

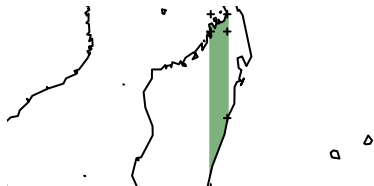

**Gluta**

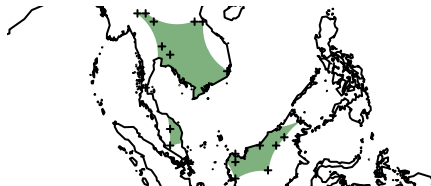

Gonocaryum

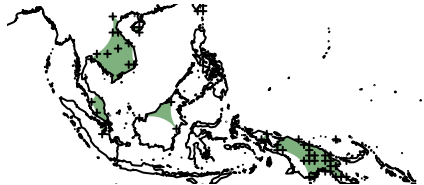

Gonystylus

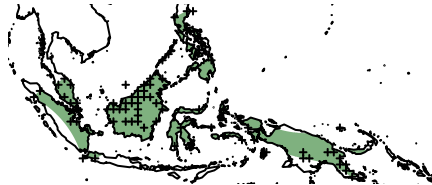

Goupia

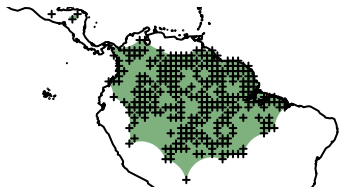

Greenwayodendron

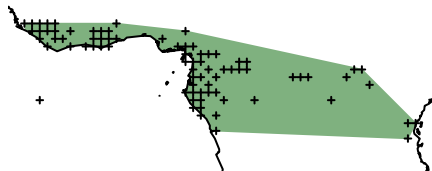

Grewia

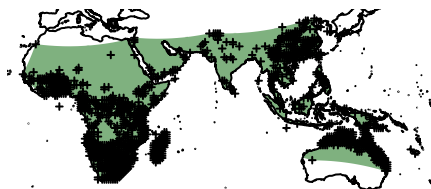

Grossera

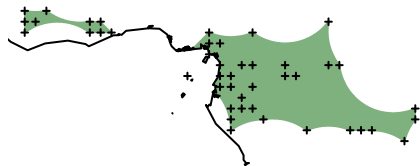

Grossera

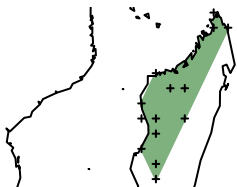

Guapira

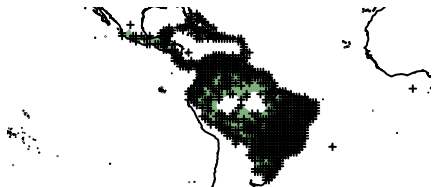

Guarea

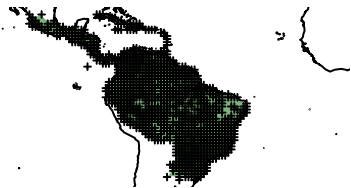

Guarea

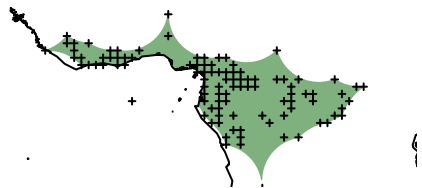

Guatteria

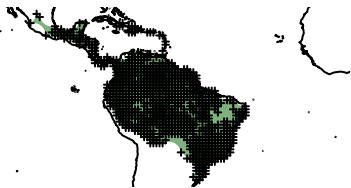

Guazuma

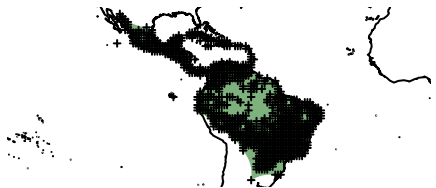

**Guettarda**

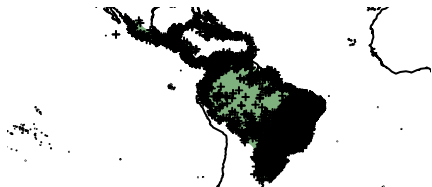

**Gustavia**

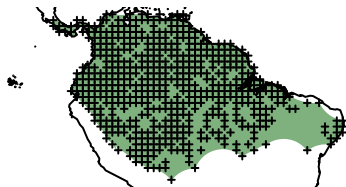

**Gymnacranthera**

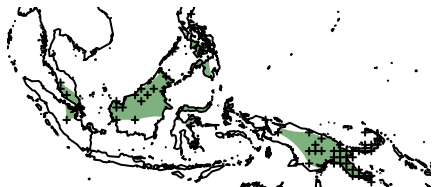

**Hasseltia**

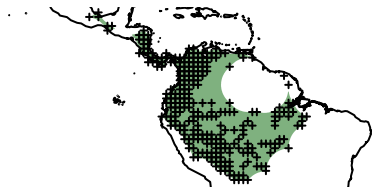

**Heisteria**

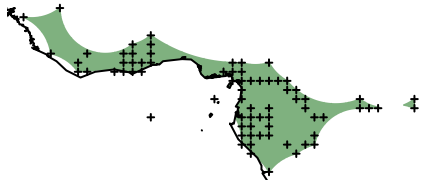

**Heisteria**

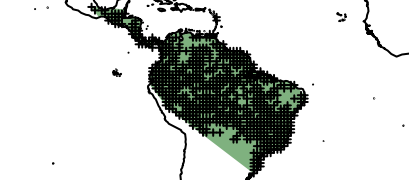

**Helicostylis**

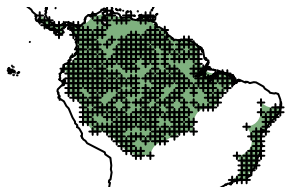

1

**Heritiera**

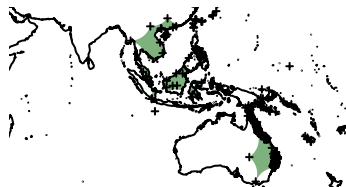

**Heritiera**

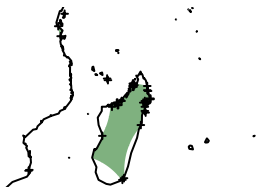

**Hevea**

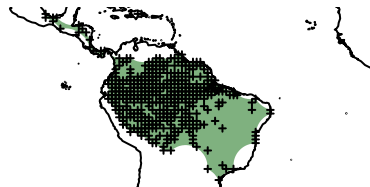

**Hexalobus**

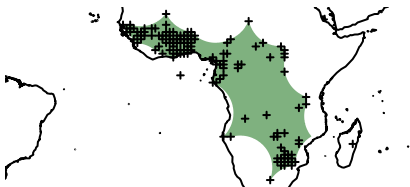

**Hirtella**

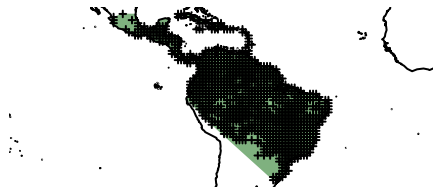

Hirtella

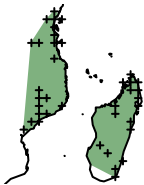

Homalium

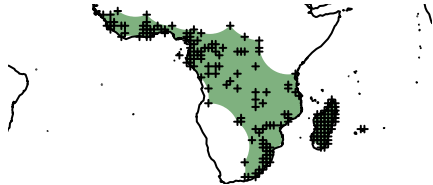

Homalium

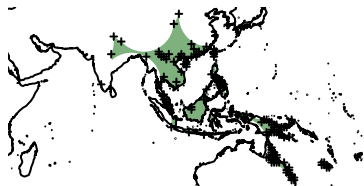

Homalium

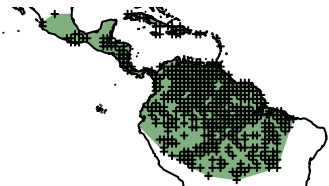

Hopea

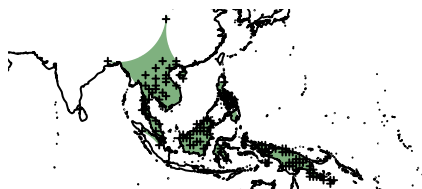

Horsfieldia

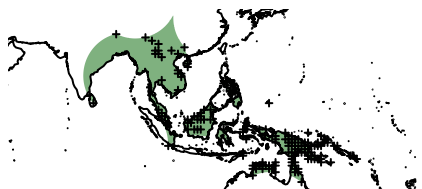

Hura

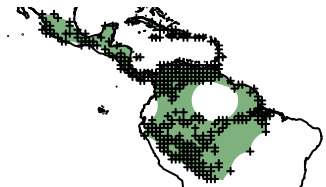

Hydnocarpus

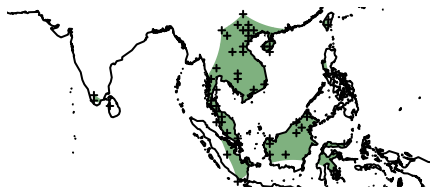

Hyiodendron

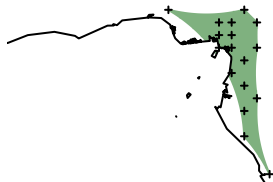

Hymenaea

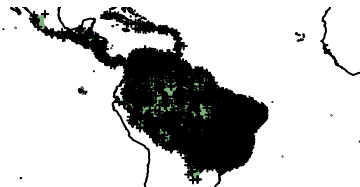

Hymenaea

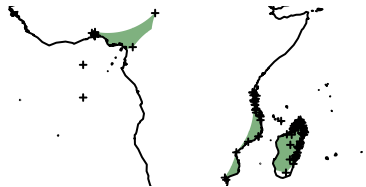

Hymenocardia

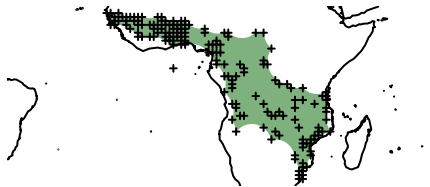



Hymenostegia

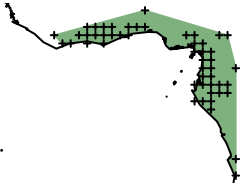

Hypodaphnis

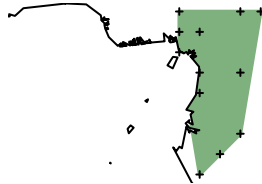

Inga

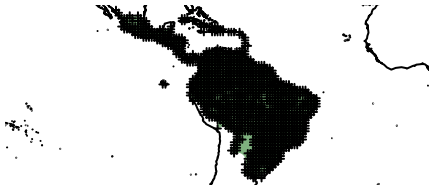

Intsia

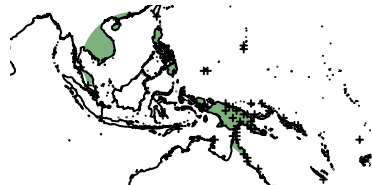

Intsia

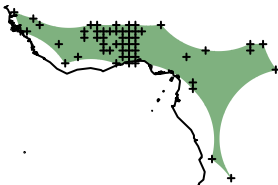

Intsia

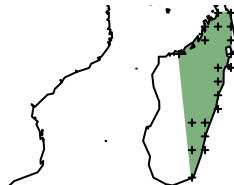

**Iriartea**

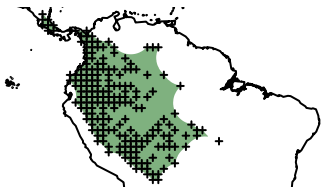

**Irvingia**

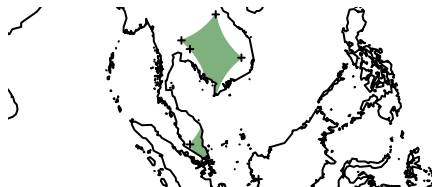

**Irvingia**

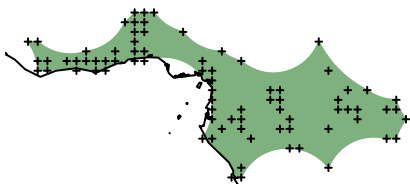

**Iryanthera**

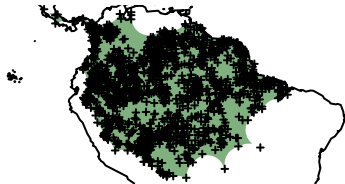

**Isolona**

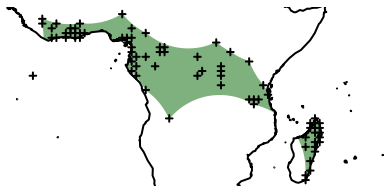

**Ixonanthes**

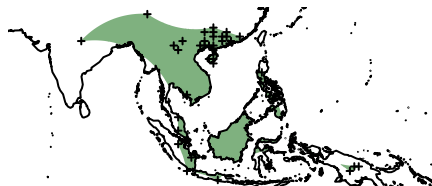

Supplement: MOESM5 [file 41598_2024_84367_MOESM5_ESM.pdf]
